# Supplementary material for: Integrated Omic Analysis Delineates Pathways Modulating Toxic TDP-43 Protein Aggregates in Amyotrophic Lateral Sclerosis
Source: MDPI journal article supplement (doi:10.3390/cells12091228), 2023-04-24
Supplement: s1 [file s1]

# Integrated Omic analysis delineates pathways modulating toxic TDP-43 protein aggregates in Amyotrophic Lateral Sclerosis

Saiswaroop Rajaratnam<sup>1, #</sup>, Akhil P S<sup>1, 2, #</sup>, Kanikaram Sai Phalguna<sup>1</sup>, Sai Sanwid Pradhan<sup>1</sup>, Meghana Manjunath<sup>3</sup>, Raksha Rao K<sup>3</sup>, Rajesh Babu Dandamudi<sup>4</sup>, Sai Krishna Srimadh Bhagavatham<sup>1</sup>, Sujith Kumar Pulukool<sup>1</sup>, Sriram Rathnakumar<sup>1</sup>, Sai Kocherlakota<sup>5</sup>, Ashish Pargaonkar<sup>6</sup>, Ravindra P. Veeranna<sup>7</sup>, Natarajan Arumugam<sup>8</sup>, Abdulrahman I. Almansour<sup>8</sup>, Bibha Choudhary<sup>3,\*</sup>, Venketesh Sivaramakrishnan<sup>1,\*</sup>

<sup>1</sup> Disease Biology Lab, Dept. of Biosciences, Sri Sathya Sai Institute of Higher Learning, Prasanthi Nilayam, Anantapur, Andhra Pradesh, India – 515134.

<sup>2</sup> Central Water and Power Research Station, Khadakwasla, Pune- 411024.

<sup>3</sup> Institute of Bioinformatics and Applied Biotechnology, Bengaluru, Karnataka, India – 560100.

<sup>4</sup> Phenomenex India, Hyderabad, Telangana, India -500084 ;

<sup>5</sup> KU Leuven, Belgium -3000.

<sup>6</sup> Application Division, Agilent Technologies Ltd., Bengaluru, India.

<sup>7</sup> Department of Biochemistry, Council of Scientific & Industrial Research (CSIR) - Central Food Technological Research Institute (CFTRI), Mysuru 570020, Karnataka, India.

<sup>8</sup> Department of Chemistry, College of Science, King Saud University, P.O. Box 2455, Riyadh 11451, Saudi Arabia.

<sup>#</sup>Both these authors contributed equally.

<sup>\*</sup>Author of correspondence

**Venketesh Sivaramakrishnan:** [svenketesh@sssihl.edu.in](mailto:svenketesh@sssihl.edu.in)

**Bibha Choudhary:** [vibha@ibab.ac.in](mailto:vibha@ibab.ac.in)

**Key Words:** ALS, amyloid, neurodegenerative disease, transcriptomics, metabolomics

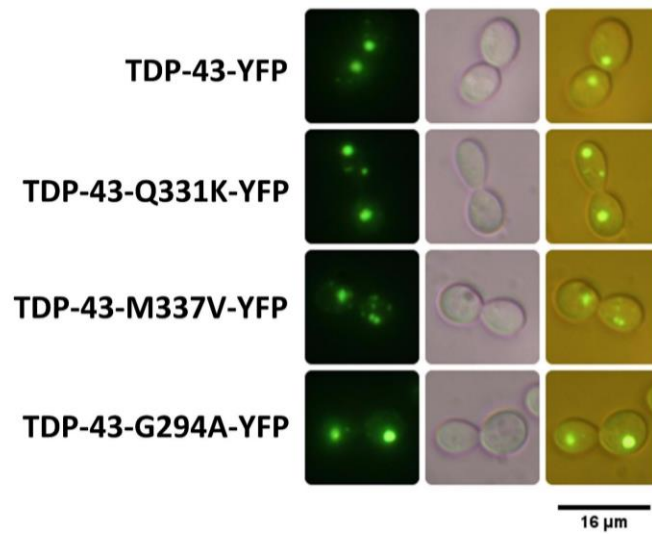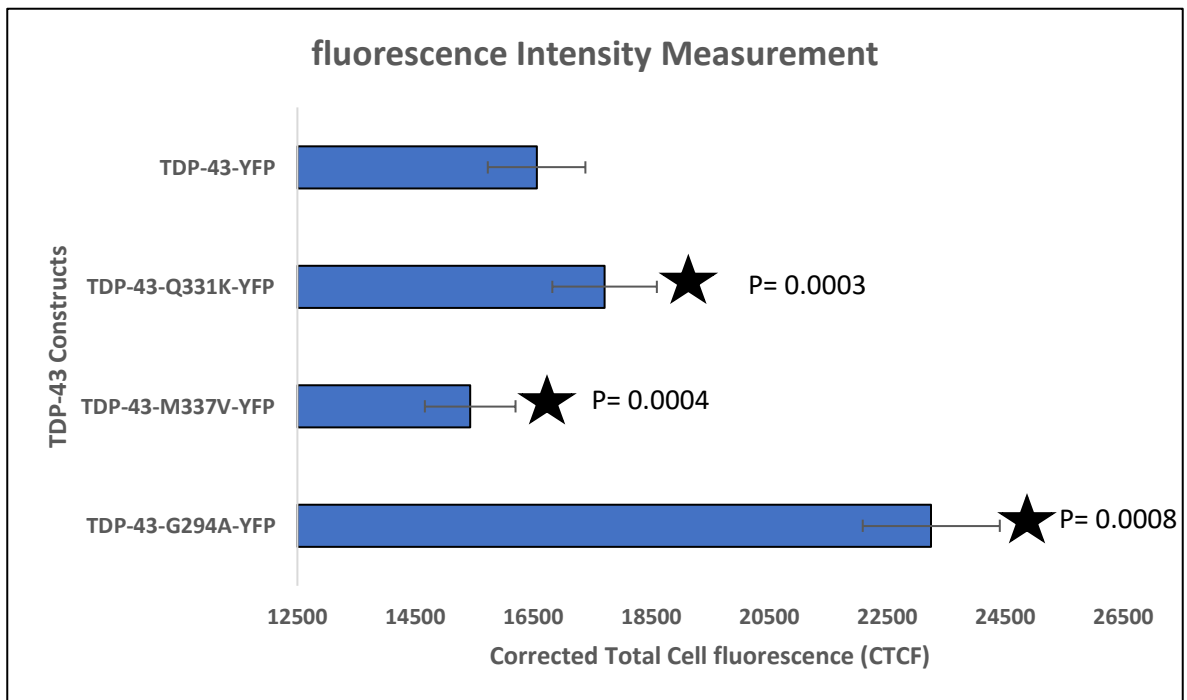

**Figure S1:** Fluorescence images (dark field, bright field and overlay) and bar graph representing results obtained from fluorescence studies of TDP-43 transformed *Saccharomyces cerevisiae*.

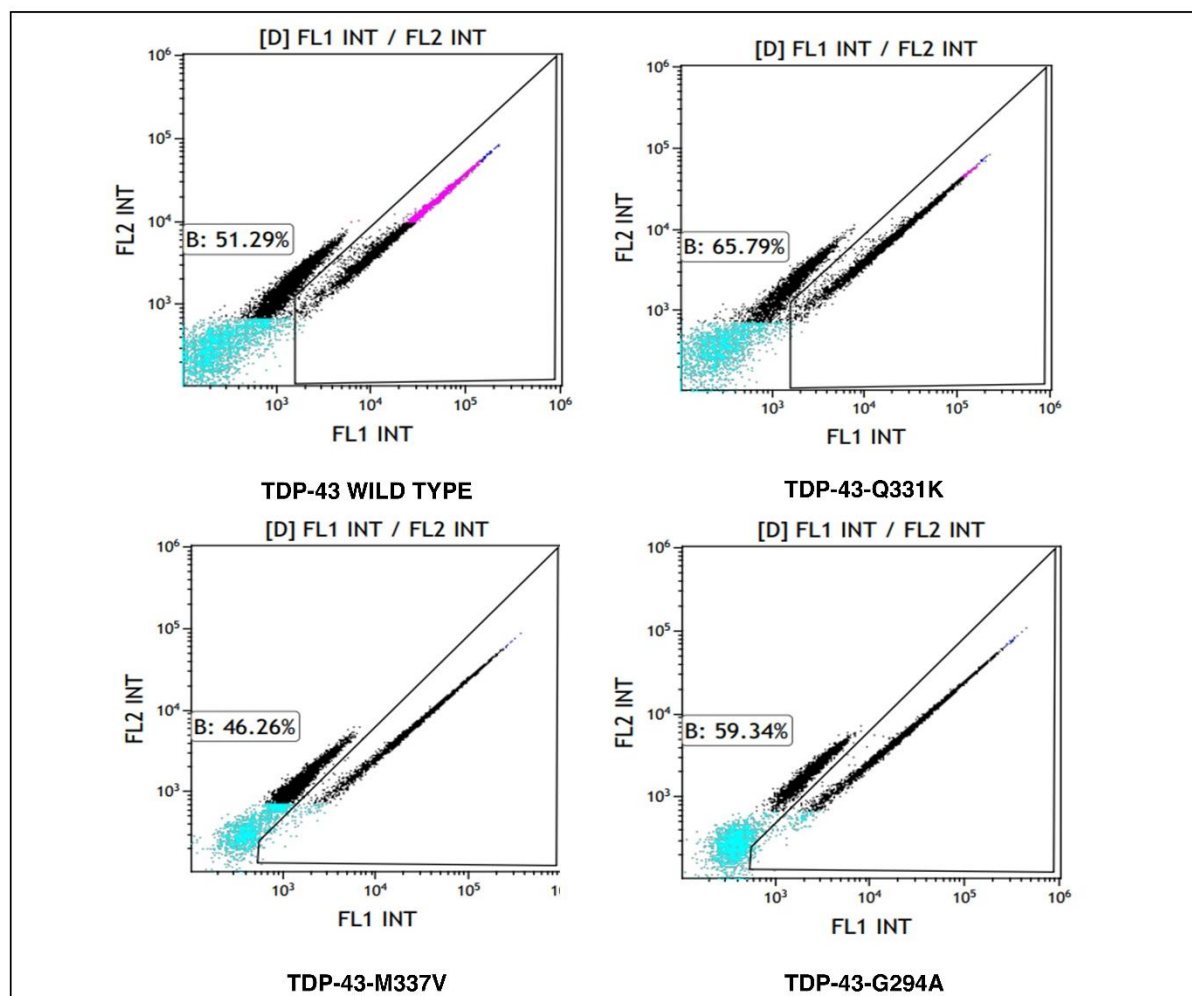

**Figure S2:** Scatter plot representing results obtained from flow cytometry analysis of TDP-43 transformed *Saccharomyces cerevisiae* using Beckman Coulter Flow Cytometer. Percentage of pure E-YFP expressing cells were obtained using FL1 and FL2 LASERS. The results obtained were concordant with the results obtained from fluorescence quantification of microscopic images.

**PCA PLOT: TDP-43-Q331K-POSITIVE MODE**

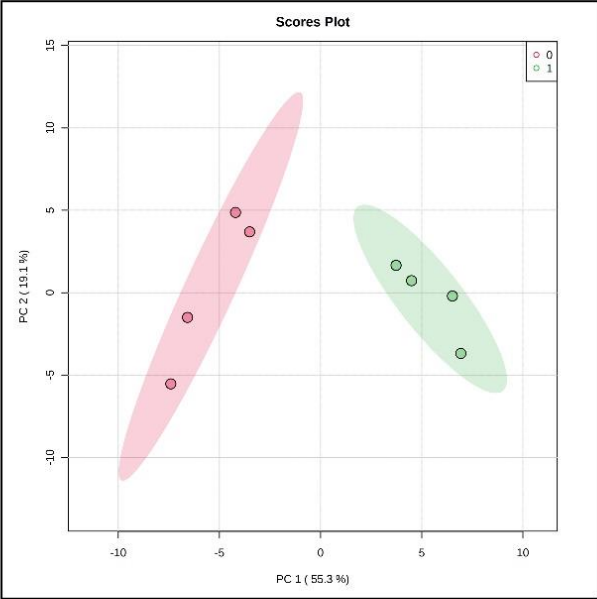

**PCA PLOT: TDP-43-Q331K-NEGATIVE MODE**

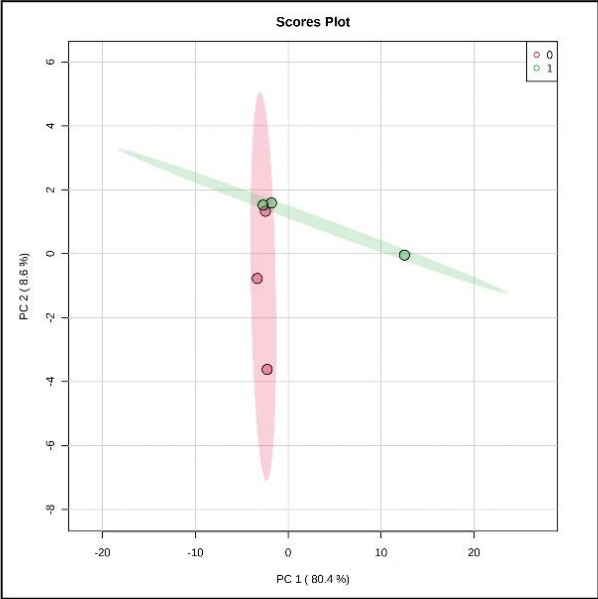

**PCA PLOT: TDP-43-G294A-POSITIVE MODE**

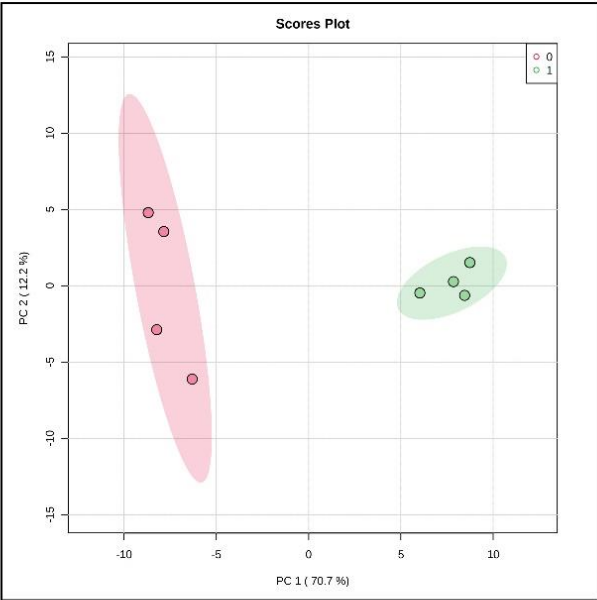

**PCA PLOT: TDP-43-M337V-POSITIVE MODE**

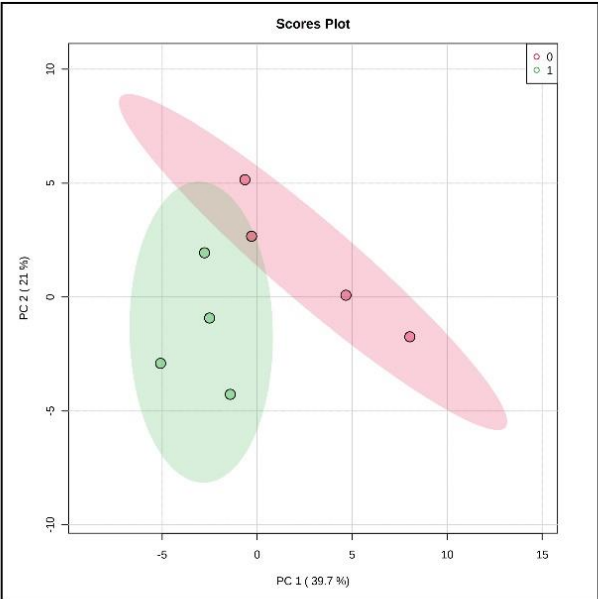

**Figure S3:** Figure representing Principal Component Analysis (PCA) plots for TDP-43 replicates. The red dots represent TDP-43-Wild Type while green dots represent TDP-43 mutants (Top left: TDP-43-Q331K-positive mode, Top right: TDP-43-Q331K negative mode, Bottom left: TDP-43-G294A, Bottom right: TDP-43-M337V).

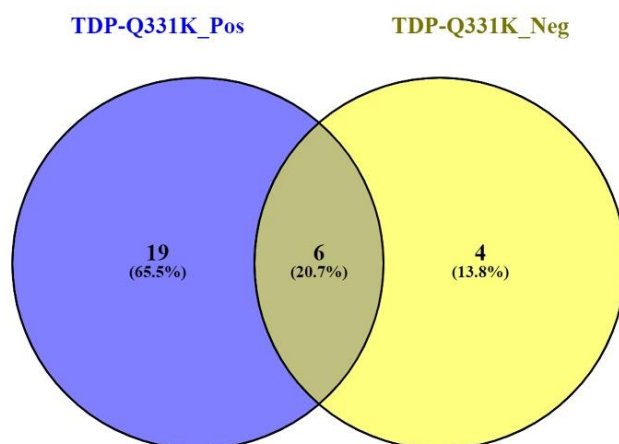

| MODES FOR TDP-Q331K                                 | TOTAL | ELEMENTS                                            |
|-----------------------------------------------------|-------|-----------------------------------------------------|
| TDP-Q331K_Negative mode and TDP-Q331K_Positive mode | 6     | Alanine, aspartate and glutamate metabolism         |
|                                                     |       | Glyoxylate and dicarboxylate metabolism             |
|                                                     |       | Nicotinate and nicotinamide metabolism              |
|                                                     |       | Purine metabolism                                   |
|                                                     |       | Sulfur metabolism                                   |
|                                                     |       | Tyrosine metabolism                                 |
| TDP-Q331K_Positive mode                             | 19    | Pantothenate and CoA biosynthesis                   |
|                                                     |       | Porphyrin and chlorophyll metabolism                |
|                                                     |       | Phenylalanine, tyrosine and tryptophan biosynthesis |
|                                                     |       | Ubiquinone and other terpenoid-quinone biosynthesis |
|                                                     |       | Lysine biosynthesis                                 |
|                                                     |       | Glutathione metabolism                              |
|                                                     |       | Valine, leucine and isoleucine degradation          |
|                                                     |       | Cyanoamino acid metabolism                          |
|                                                     |       | Amino sugar and nucleotide sugar metabolism         |
|                                                     |       | Pyrimidine metabolism                               |
|                                                     |       | Tryptophan metabolism                               |
|                                                     |       | Methane metabolism                                  |
|                                                     |       | Cysteine and methionine metabolism                  |
|                                                     |       | Thiamine metabolism                                 |
|                                                     |       | Aminoacyl-tRNA biosynthesis                         |
|                                                     |       | Valine, leucine and isoleucine biosynthesis         |
|                                                     |       | Phenylalanine metabolism                            |
|                                                     |       | Glycine, serine and threonine metabolism            |
|                                                     |       | Arginine and proline metabolism                     |
| TDP-Q331K_Negative mode                             | 4     | Citrate cycle (TCA cycle)                           |
|                                                     |       | Starch and sucrose metabolism                       |
|                                                     |       | Butanoate metabolism                                |
|                                                     |       | Propanoate metabolism                               |

**Figure S4:** Venn Diagram and table representing common pathways enriched between metabolites obtained from positive and negative mode analysis of TDP-43-Q331K Mutant.

## Mice A315T

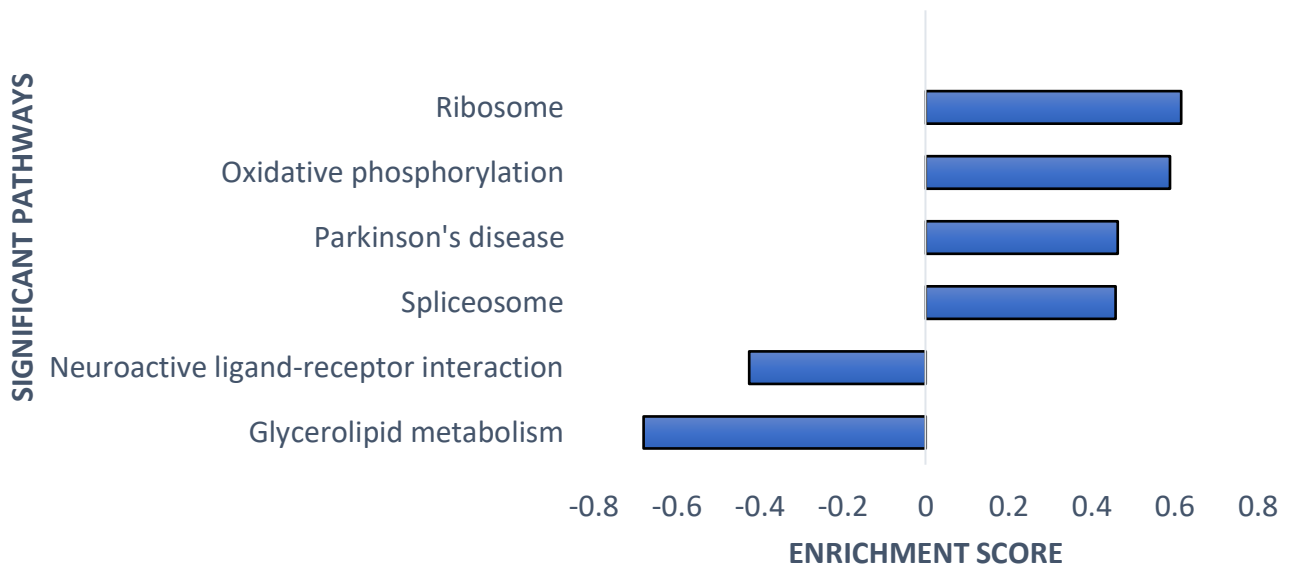

**Figure S5:** Results obtained from GSEA analysis motor neurons from of TDP-43 A315T mutant mice – [ (2 Disease Mutants + 2 Controls, Adj.P. Value less than 0.05) (KEGG Database)].

## HUMAN CORTEX

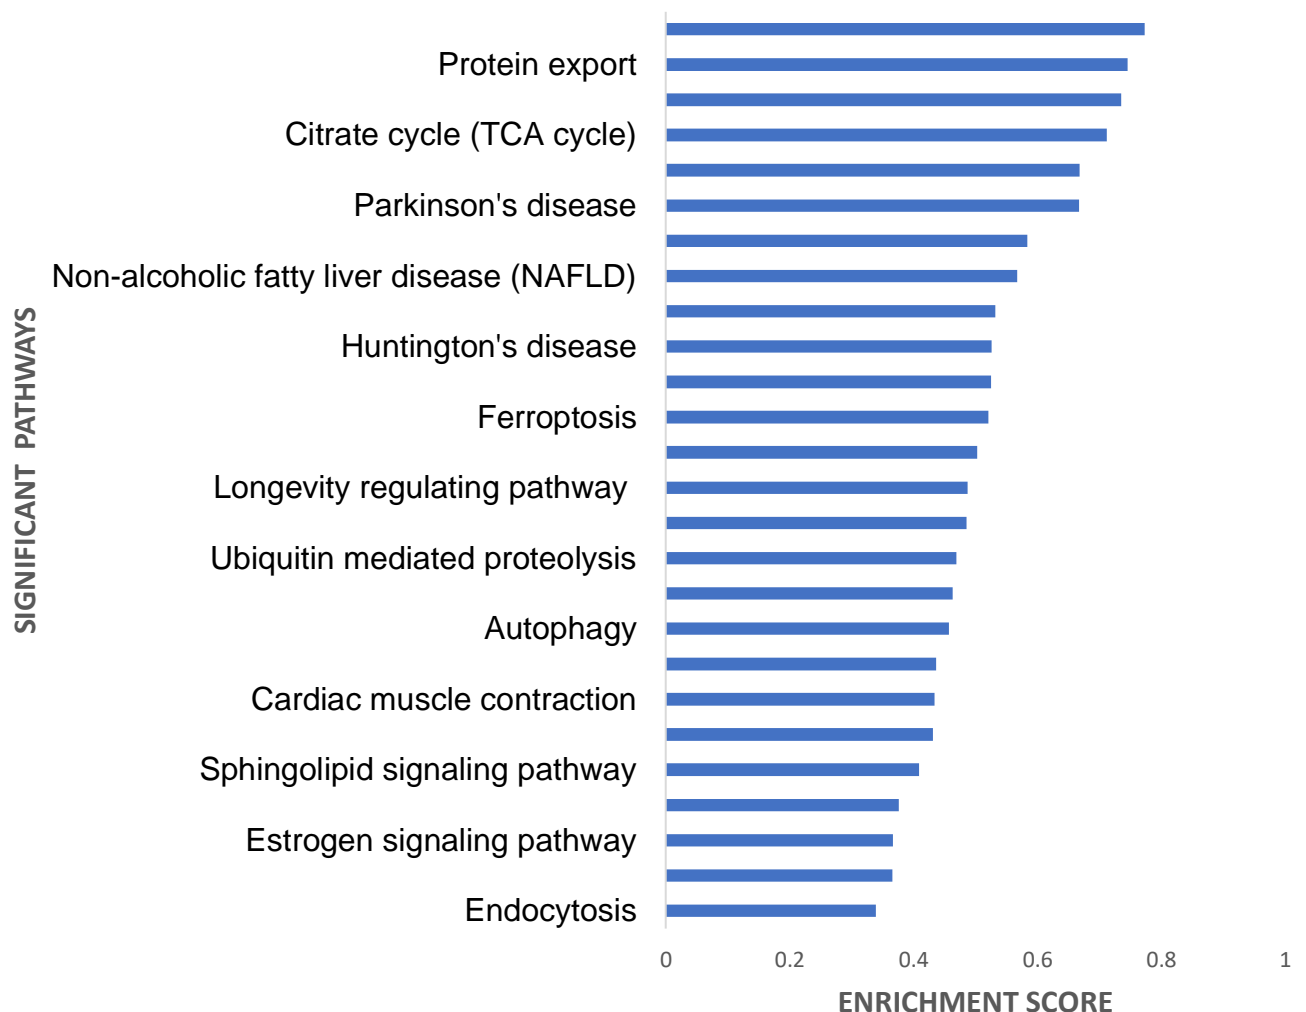

**Figure S6:** Results obtained from GSEA analysis of patient cortex datasets- [ (146 Disease + 16 Controls, Adj.P. Value less than 0.05) (KEGG Database)]. (Figures were made using [www.networkanalyst.ca](http://www.networkanalyst.ca) and Microsoft Excel 2019).

| PATHWAYS                                               | TOTAL | EXPECTED | HITS | RAW P    | FDR      | IMPACT   |
|--------------------------------------------------------|-------|----------|------|----------|----------|----------|
| PURINE METABOLISM                                      | 152   | 3.6961   | 15   | 3.12E-06 | 0.00034  | 0.54237  |
| GLYCINE, SERINE AND<br>THREONINE METABOLISM            | 81    | 1.9697   | 10   | 2.18E-05 | 0.001187 | 0.74074  |
| PEROXISOME                                             | 39    | 0.94835  | 7    | 3.41E-05 | 0.001238 | 0        |
| RIBOSOME                                               | 181   | 4.4013   | 12   | 0.001361 | 0.037099 | 0        |
| PYRIMIDINE METABOLISM                                  | 94    | 2.2858   | 8    | 0.001881 | 0.040997 | 0.4537   |
| THIAMINE METABOLISM                                    | 50    | 1.2158   | 5    | 0.006919 | 0.1257   | 0.37778  |
| VALINE, LEUCINE AND<br>ISOLEUCINE BIOSYNTHESIS         | 35    | 0.85109  | 4    | 0.00973  | 0.15152  | 0.66667  |
| GLYOXYLATE AND<br>DICARBOXYLATE METABOLISM             | 92    | 2.2371   | 6    | 0.023811 | 0.32443  | 0.28916  |
| RNA POLYMERASE                                         | 30    | 0.7295   | 3    | 0.035329 | 0.38675  | 0        |
| TRYPTOPHAN METABOLISM                                  | 101   | 2.456    | 6    | 0.035537 | 0.38675  | 0.2381   |
| CYANOAMINO ACID METABOLISM                             | 53    | 1.2888   | 4    | 0.039029 | 0.38675  | 0.041667 |
| CYSTEINE AND METHIONINE<br>METABOLISM                  | 106   | 2.5776   | 6    | 0.043425 | 0.39445  | 0.31532  |
| ALANINE, ASPARTATE AND<br>GLUTAMATE METABOLISM         | 60    | 1.459    | 4    | 0.057193 | 0.42286  | 0.44231  |
| MAPK SIGNALING PATHWAY -<br>YEAST                      | 114   | 2.7721   | 6    | 0.058185 | 0.42286  | 0.09375  |
| NUCLEOTIDE EXCISION REPAIR                             | 37    | 0.89972  | 3    | 0.059884 | 0.42286  | 0        |
| ABC TRANSPORTERS                                       | 145   | 3.5259   | 7    | 0.062071 | 0.42286  | 0        |
| PROPANOATE METABOLISM                                  | 63    | 1.532    | 4    | 0.066153 | 0.42416  | 0.26667  |
| PANTOTHENATE AND COA<br>BIOSYNTHESIS                   | 44    | 1.0699   | 3    | 0.090504 | 0.54805  | 0.30233  |
| SULFUR METABOLISM                                      | 48    | 1.1672   | 3    | 0.1104   | 0.63334  | 0.12903  |
| PHENYLALANINE, TYROSINE AND<br>TRYPTOPHAN BIOSYNTHESIS | 52    | 1.2645   | 3    | 0.13181  | 0.71835  | 0.31667  |
| HIPPO SIGNALING PATHWAY -<br>MULTIPLE SPECIES          | 8     | 0.19453  | 1    | 0.17887  | 0.92844  | 0.090909 |

**Table S1:** Significant pathways obtained from pathway enrichment analysis of significant metabolites (TDP-43-Q331K both modes integrated).

| PATHWAYS                                            | TOTAL | EXPECTED | HITS | RAW P    | FDR      | IMPACT  |
|-----------------------------------------------------|-------|----------|------|----------|----------|---------|
| AMINOACYL-TRNA BIOSYNTHESIS                         | 46    | 2.6599   | 13   | 4.22E-07 | 3.08E-05 | 0       |
| ARGININE BIOSYNTHESIS                               | 18    | 1.0408   | 5    | 0.002564 | 0.093567 | 0.36182 |
| ARGININE AND PROLINE METABOLISM                     | 25    | 1.4456   | 5    | 0.011654 | 0.28358  | 0.28571 |
| NITROGEN METABOLISM                                 | 5     | 0.28912  | 2    | 0.02931  | 0.5349   | 0       |
| GLUTATHIONE METABOLISM                              | 26    | 1.5034   | 4    | 0.057604 | 0.83835  | 0.11547 |
| CYANOAMINO ACID METABOLISM                          | 8     | 0.46259  | 2    | 0.073401 | 0.83835  | 0       |
| VALINE, LEUCINE AND ISOLEUCINE DEGRADATION          | 18    | 1.0408   | 3    | 0.080389 | 0.83835  | 0       |
| GLYCINE, SERINE AND THREONINE METABOLISM            | 32    | 1.8503   | 4    | 0.10743  | 0.8476   | 0.27463 |
| UBIQUINONE AND OTHER TERPENOID-QUINONE BIOSYNTHESIS | 2     | 0.11565  | 1    | 0.11236  | 0.8476   | 0       |
| PHENYLALANINE, TYROSINE AND TRYPTOPHAN BIOSYNTHESIS | 21    | 1.2143   | 3    | 0.11611  | 0.8476   | 0.02144 |
| ALANINE, ASPARTATE AND GLUTAMATE METABOLISM         | 22    | 1.2721   | 3    | 0.12916  | 0.85717  | 0.51798 |
| NICOTINATE AND NICOTINAMIDE METABOLISM              | 12    | 0.69388  | 2    | 0.14944  | 0.90908  | 0.19876 |
| CARBAPENEM BIOSYNTHESIS                             | 3     | 0.17347  | 1    | 0.16381  | 0.91984  | 0       |
| GLYOXYLATE AND DICARBOXYLATE METABOLISM             | 26    | 1.5034   | 3    | 0.18599  | 0.9698   | 0.10442 |

**Table S2 :** Significant pathways obtained from pathway enrichment analysis of significant metabolites (TDP-43-G294A-Positive Mode).

| PATHWAYS                                            | TOTAL | EXPECTED | HITS | RAW P    | FDR     | IMPACT  |
|-----------------------------------------------------|-------|----------|------|----------|---------|---------|
| PURINE METABOLISM                                   | 62    | 1.4059   | 5    | 0.009942 | 0.68502 | 0.10325 |
| TRYPTOPHAN METABOLISM                               | 30    | 0.68027  | 3    | 0.027391 | 0.68502 | 0.36047 |
| NICOTINATE AND NICOTINAMIDE METABOLISM              | 12    | 0.27211  | 2    | 0.028151 | 0.68502 | 0.19876 |
| GLYCINE, SERINE AND THREONINE METABOLISM            | 32    | 0.72562  | 2    | 0.16162  | 1       | 0       |
| PYRIMIDINE METABOLISM                               | 34    | 0.77098  | 2    | 0.178    | 1       | 0.01998 |
| CYSTEINE AND METHIONINE METABOLISM                  | 41    | 0.92971  | 2    | 0.23719  | 1       | 0.1717  |
| PHENYLALANINE, TYROSINE AND TRYPTOPHAN BIOSYNTHESIS | 21    | 0.47619  | 1    | 0.38571  | 1       | 0       |
| AMINOACYL-TRNA BIOSYNTHESIS                         | 46    | 1.0431   | 1    | 0.66152  | 1       | 0       |

**Table S3 :** Significant pathways obtained from pathway enrichment analysis of significant metabolites (TDP-43-M337V-Positive Mode).



**Table S4 : Yeast mass spectrometry Detected Metabolites (MRM).**

| Compound Name                       | ISD   | Precursor ion | Product ion | Dwell | Frag(V) | CE(V) | Polarity |
|-------------------------------------|-------|---------------|-------------|-------|---------|-------|----------|
| (L)-arginino-succinate              | FALSE | 291.1299      | 70          | 3     | 380     | 37    | POSITIVE |
| 2-Aminobutyraldehyde                | FALSE | 88.0757       | 70.1        | 3     | 380     | 9     | POSITIVE |
| 3-phospho-serine                    | FALSE | 186.0162      | 88          | 3     | 380     | 12    | POSITIVE |
| 4 Acetamidobutanoic acid            | FALSE | 146.08        | 86.1        | 3     | 380     | 9     | POSITIVE |
| 4 Hydroxybutyric acid               | FALSE | 105.0546      | 45          | 3     | 380     | 5     | POSITIVE |
| 4-Coumarate                         | FALSE | 165.0446      | 119         | 3     | 380     | 10    | POSITIVE |
| 5-Hydroxyindoleacetic acid          | FALSE | 192.0655      | 146         | 3     | 380     | 10    | POSITIVE |
| 5-oxo-proline                       | FALSE | 130.0499      | 84          | 3     | 380     | 10    | POSITIVE |
| Acetyl Carnitine                    | FALSE | 204.123       | 85          | 3     | 380     | 9     | POSITIVE |
| Allo-Threonine                      | FALSE | 120.0655      | 74.1        | 3     | 380     | 5     | POSITIVE |
| Aminobutyric acid                   | FALSE | 104.0706      | 44.1        | 3     | 380     | 9     | POSITIVE |
| Arginine                            | FALSE | 175.119       | 70.1        | 3     | 380     | 25    | POSITIVE |
| betaine aldehyde                    | FALSE | 103.0992      | 58          | 3     | 380     | 21    | POSITIVE |
| Carnitine                           | FALSE | 162.1125      | 60.1        | 3     | 380     | 12    | POSITIVE |
| citrulline                          | FALSE | 176.103       | 159         | 3     | 380     | 5     | POSITIVE |
| Creatinine                          | FALSE | 114.0662      | 44          | 3     | 380     | 17    | POSITIVE |
| Cytidine 5 -Monophosphate (5-CMP)   | FALSE | 324           | 95          | 3     | 380     | 40    | POSITIVE |
| Cytosine                            | FALSE | 112.1         | 95.1        | 3     | 380     | 17    | POSITIVE |
| DL-Pipecolic acid                   | FALSE | 130.0863      | 84          | 3     | 380     | 18    | POSITIVE |
| Erythrono-1,4-lactone               | FALSE | 119.11        | 91.1        | 3     | 380     | 10    | POSITIVE |
| Ethylmalonate/Methyl Malonate       | FALSE | 133.0495      | 115.04      | 3     | 380     | 10    | POSITIVE |
| Glucosamine/Galactosamine           | FALSE | 180.0866      | 162         | 3     | 380     | 5     | POSITIVE |
| Glutamic acid                       | FALSE | 148.0604      | 84          | 3     | 380     | 17    | POSITIVE |
| Glycine                             | FALSE | 76.0393       | 30          | 3     | 380     | 9     | POSITIVE |
| Gly-Gly                             | FALSE | 133.0608      | 30          | 3     | 380     | 20    | POSITIVE |
| Gly-Leu                             | FALSE | 189.1234      | 130         | 3     | 380     | 10    | POSITIVE |
| Homoserine                          | FALSE | 120.0655      | 74.1        | 3     | 380     | 9     | POSITIVE |
| Hypoxanthine                        | FALSE | 137           | 119         | 3     | 380     | 21    | POSITIVE |
| Isoleucine                          | FALSE | 132.1019      | 86.1        | 3     | 380     | 9     | POSITIVE |
| Kynurenic acid                      | FALSE | 190.0499      | 144.1       | 3     | 380     | 16    | POSITIVE |
| Kynurenine                          | FALSE | 209.0921      | 192         | 3     | 380     | 5     | POSITIVE |
| L-anthranilic acid                  | FALSE | 139           | 121         | 3     | 380     | 12    | POSITIVE |
| L-Arginine                          | FALSE | 177.1         | 159.1       | 3     | 380     | 10    | POSITIVE |
| L-Thymine                           | FALSE | 131.1         | 113.9       | 3     | 380     | 15    | POSITIVE |
| L-Tryptophan                        | TRUE  | 207.1         | 189         | 3     | 380     | 10    | POSITIVE |
| Lysine                              | FALSE | 147.1128      | 130.2       | 3     | 380     | 5     | POSITIVE |
| Methyl Nicotinamide                 | FALSE | 138.08        | 95.1        | 3     | 380     | 25    | POSITIVE |
| Methylglutaric acid                 | FALSE | 147.0652      | 55.05423    | 3     | 380     | 10    | POSITIVE |
| Myristoleic acid                    | FALSE | 227.2006      | 43.1        | 3     | 380     | 25    | POSITIVE |
| N,N Dimethyl Glycine/Methyl alanine | FALSE | 104.0706      | 58.1        | 3     | 380     | 9     | POSITIVE |

|                                  |       |          |        |   |     |    |          |
|----------------------------------|-------|----------|--------|---|-----|----|----------|
| N-acetylalanine                  | FALSE | 132.0655 | 44.1   | 3 | 380 | 20 | POSITIVE |
| N-Acetylneuraminic acid          | FALSE | 310.1    | 121    | 3 | 380 | 21 | POSITIVE |
| N-Acetylornithine                | FALSE | 175.1077 | 70.1   | 3 | 380 | 29 | POSITIVE |
| N-carbamoyl-L-aspartate          | FALSE | 177.0506 | 74     | 3 | 380 | 19 | POSITIVE |
| Nicotinamide                     | FALSE | 123.0553 | 80.1   | 3 | 380 | 20 | POSITIVE |
| Nonadecanoic acid                | FALSE | 298.2866 | 281.4  | 3 | 380 | 10 | POSITIVE |
| Octonyl Carnitine                | FALSE | 288.2    | 85     | 3 | 380 | 21 | POSITIVE |
| Oleic acid                       | FALSE | 283.27   | 89.2   | 3 | 380 | 13 | POSITIVE |
| Phenyl alanine                   | FALSE | 166.0963 | 120.1  | 3 | 380 | 13 | POSITIVE |
| Proline                          | FALSE | 116.0706 | 70.1   | 3 | 380 | 17 | POSITIVE |
| Putrescine                       | FALSE | 89.1073  | 72.1   | 3 | 380 | 8  | POSITIVE |
| SAH                              | FALSE | 385.1289 | 136.1  | 3 | 380 | 33 | POSITIVE |
| Serine                           | FALSE | 106.0499 | 60.1   | 3 | 380 | 9  | POSITIVE |
| Thymine-d4                       | FALSE | 131      | 113.9  | 3 | 380 | 16 | POSITIVE |
| Tryptophan                       | FALSE | 205.1    | 146.1  | 3 | 380 | 10 | POSITIVE |
| Tyrosine                         | FALSE | 182.0812 | 136.1  | 3 | 380 | 9  | POSITIVE |
| Uric acid                        | FALSE | 169      | 141    | 3 | 380 | 13 | POSITIVE |
| Valine                           | FALSE | 118.0863 | 72.2   | 3 | 380 | 9  | POSITIVE |
| Xanthine                         | FALSE | 153.04   | 110    | 3 | 380 | 21 | POSITIVE |
| 4-Methyl-2-oxo pentanoic acid    | FALSE | 131.0703 | 71     | 3 | 380 | 10 | POSITIVE |
| Adenine                          | FALSE | 136.6    | 119    | 3 | 380 | 10 | POSITIVE |
| AMP                              | FALSE | 348.0704 | 136    | 3 | 380 | 17 | POSITIVE |
| Asparagine                       | FALSE | 133.0608 | 74     | 3 | 380 | 13 | POSITIVE |
| Cystathionine                    | FALSE | 223.0747 | 134.1  | 3 | 380 | 8  | POSITIVE |
| dGMP                             | FALSE | 348.0704 | 135    | 3 | 380 | 38 | POSITIVE |
| Glutamine                        | FALSE | 147.0764 | 130.1  | 3 | 380 | 5  | POSITIVE |
| Glu-Tyr                          | FALSE | 311.1238 | 293.1  | 3 | 380 | 10 | POSITIVE |
| Glycerol 3-phosphate             | FALSE | 173.02   | 132    | 3 | 380 | 5  | POSITIVE |
| Histamine                        | FALSE | 112.0869 | 95.1   | 3 | 380 | 13 | POSITIVE |
| Histidine                        | FALSE | 156.0768 | 110.1  | 3 | 380 | 9  | POSITIVE |
| Hydroxy Stearic acid Methy ester | FALSE | 315.3    | 97.1   | 3 | 380 | 9  | POSITIVE |
| Isovaleryl Carnitine             | FALSE | 246.2    | 85     | 3 | 380 | 17 | POSITIVE |
| Myo-Inositol                     | FALSE | 181.07   | 139.9  | 3 | 380 | 5  | POSITIVE |
| N-acetyl Glucosamine 6 Phos      | FALSE | 302.0635 | 284.1  | 3 | 380 | 5  | POSITIVE |
| Nicotinamide ribotide            | FALSE | 335      | 123    | 3 | 380 | 30 | POSITIVE |
| Quinic acid                      | FALSE | 193.0707 | 111.04 | 3 | 380 | 10 | POSITIVE |
| thiamine                         | FALSE | 266.1196 | 122    | 3 | 380 | 19 | POSITIVE |
| Uracil                           | FALSE | 113      | 72     | 3 | 380 | 4  | POSITIVE |
| 1,3-diphopshateglycerate         | FALSE | 265      | 79     | 3 | 380 | 37 | NEGATIVE |
| 2,3-dihydroxybenzoic acid        | FALSE | 153      | 109    | 3 | 380 | 19 | NEGATIVE |
| 6-phospho-D-gluconate            | FALSE | 275      | 97     | 3 | 380 | 13 | NEGATIVE |

|                                |       |         |       |   |     |    |          |
|--------------------------------|-------|---------|-------|---|-----|----|----------|
| ADP                            | FALSE | 426.1   | 159   | 3 | 380 | 27 | NEGATIVE |
| anthranilate                   | FALSE | 136     | 92    | 3 | 380 | 18 | NEGATIVE |
| GDP                            | FALSE | 426.12  | 159   | 3 | 380 | 27 | NEGATIVE |
| dihydrooorotate                | FALSE | 157     | 113   | 3 | 380 | 14 | NEGATIVE |
| D-sedoheptulose-1-7-phosphate  | FALSE | 289     | 97    | 3 | 380 | 27 | NEGATIVE |
| Eicasatetraenoic acid-D8 (ETA) | FALSE | 311.5   | 59.05 | 3 | 380 | 35 | NEGATIVE |
| Farnesyl-PP                    | FALSE | 381     | 78.7  | 3 | 380 | 40 | NEGATIVE |
| Fructose-6-Phosphate           | FALSE | 259     | 79.1  | 3 | 380 | 37 | NEGATIVE |
| Fumarate                       | FALSE | 119     | 74    | 3 | 380 | 5  | NEGATIVE |
| Fumaric acid                   | FALSE | 115     | 71.1  | 3 | 380 | 5  | NEGATIVE |
| Glucose-6-Phosphate            | FALSE | 259     | 97    | 3 | 380 | 5  | NEGATIVE |
| Glucuronic acid                | FALSE | 193     | 73.1  | 3 | 380 | 9  | NEGATIVE |
| Glutamine                      | FALSE | 147     | 111   | 3 | 380 | 9  | NEGATIVE |
| hexose-phosphate               | FALSE | 259     | 79    | 3 | 380 | 42 | NEGATIVE |
| Hydroxyisocaproic acid         | FALSE | 131.006 | 85.1  | 3 | 380 | 16 | NEGATIVE |
| inosine                        | FALSE | 267     | 135   | 3 | 380 | 27 | NEGATIVE |
| Ketoglutarate                  | FALSE | 145     | 101.1 | 3 | 380 | 5  | NEGATIVE |
| lactate                        | FALSE | 89      | 43.2  | 3 | 380 | 16 | NEGATIVE |
| L-Anthranilic acid             | FALSE | 137     | 93.1  | 3 | 380 | 15 | NEGATIVE |
| L-Glutamic acid D5             | FALSE | 151     | 107   | 3 | 380 | 13 | NEGATIVE |
| L-Jasmonic acid                | TRUE  | 209     | 59    | 3 | 380 | 10 | NEGATIVE |
| L-Tryptophan                   | TRUE  | 205     | 117   | 3 | 380 | 10 | NEGATIVE |
| L-Zeatin                       | TRUE  | 218     | 133.5 | 3 | 380 | 21 | NEGATIVE |
| Malic acid                     | FALSE | 133     | 115.1 | 3 | 380 | 5  | NEGATIVE |
| Maltotetraose                  | FALSE | 665.2   | 161.1 | 3 | 380 | 13 | NEGATIVE |

|                                  |       |         |       |   |     |    |              |
|----------------------------------|-------|---------|-------|---|-----|----|--------------|
| N-acety AA-d3                    | FALSE | 177     | 90.8  | 3 | 380 | 6  | NEGATIV<br>E |
| N-Aetyl Aspartic acid            | FALSE | 174     | 88.1  | 3 | 380 | 13 | NEGATIV<br>E |
| octulose-monophosphate (O8P-O1P) | FALSE | 319     | 97    | 3 | 380 | 22 | NEGATIV<br>E |
| p-aminobenzoate                  | FALSE | 136.05  | 92    | 3 | 380 | 18 | NEGATIV<br>E |
| PEP                              | FALSE | 167     | 79    | 3 | 380 | 9  | NEGATIV<br>E |
| Pyruvate                         | FALSE | 89      | 44    | 3 | 380 | 10 | NEGATIV<br>E |
| Ribose-5-phosphate               | FALSE | 229.01  | 96.97 | 3 | 380 | 15 | NEGATIV<br>E |
| shikimate                        | FALSE | 173     | 93    | 3 | 380 | 20 | NEGATIV<br>E |
| sn-glycerol-3-phosphate          | FALSE | 171     | 79    | 3 | 380 | 15 | NEGATIV<br>E |
| S-ribosyl-L-homocysteine_neg     | FALSE | 266     | 134   | 3 | 380 | 20 | NEGATIV<br>E |
| succinate                        | FALSE | 117     | 73    | 3 | 380 | 12 | NEGATIV<br>E |
| taurine                          | FALSE | 124     | 80    | 3 | 380 | 18 | NEGATIV<br>E |
| Tetradecanoic acid-D3 (TDA-D3)   | FALSE | 230.3   | 58    | 3 | 380 | 40 | NEGATIV<br>E |
| trehalose-6-Phosphate            | FALSE | 421     | 79    | 3 | 380 | 36 | NEGATIV<br>E |
| UDP-D-glucose                    | FALSE | 565     | 323   | 3 | 380 | 25 | NEGATIV<br>E |
| UDP-N-acetyl-glucosamine         | FALSE | 606     | 385   | 3 | 380 | 28 | NEGATIV<br>E |
| Uric acid                        | FALSE | 167.001 | 124   | 3 | 380 | 17 | NEGATIV<br>E |
| uridine                          | FALSE | 243     | 200   | 3 | 380 | 21 | NEGATIV<br>E |
| Zeatine                          | FALSE | 218     | 173   | 3 | 380 | 10 | NEGATIV<br>E |

**Table S5 : Yeast mass spectrometry (Machine Parameters).**

| Source Parameters |           |           |
|-------------------|-----------|-----------|
| Parameter         | Value (+) | Value (-) |
| Gas Temp (°C)     | 250       | 250       |
| Gas Flow (l/min)  | 14        | 14        |
| Nebulizer (psi)   | 20        | 20        |
| SheathGasHeater   | 350       | 350       |
| SheathGasFlow     | 12        | 12        |
| Capillary (V)     | 3000      | 3000      |
| VCharging         | 1000      | 1000      |

| Ion Funnel Parameters |     |
|-----------------------|-----|
| Pos High Pressure RF  | 150 |
| Pos Low Pressure RF   | 60  |
| Neg High Pressure RF  | 150 |
| Neg Low Pressure RF   | 60  |

| Auxiliary                |              |
|--------------------------|--------------|
| Draw Speed               | 100.0 µL/min |
| Eject Speed              | 100.0 µL/min |
| Draw Position Offset     | 0.0 mm       |
| Wait Time After Drawing  | 2.0 s        |
| Vial/Well bottom sensing | Yes          |
|                          |              |

| Injection        |                            |
|------------------|----------------------------|
| Injection Mode   | Injection with needle wash |
| Injection Volume | 2.00 µL                    |
|                  |                            |

| Needle Wash          |                             |
|----------------------|-----------------------------|
| Needle Wash Location | Flush Port                  |
| Wash Time            | 10.0 s                      |
| Flow                 | 0.300 mL/min                |
| Use Solvent Types    | Yes                         |
| Stroke Mode          | Synchronized                |
| Low Pressure Limit   | 0.00 bar                    |
| High Pressure Limit  | 600.00 bar                  |
| Max. Flow Ramp Up    | 100.000 mL/min <sup>2</sup> |
| Max. Flow Ramp Down  | 100.000 mL/min <sup>2</sup> |
| Expected Mixer       | No check                    |

| Stop Time      |           |
|----------------|-----------|
| Stoptime Mode  | Time set  |
| Stoptime       | 23.00 min |
| Post time mode | Time set  |
| Post time      | 5.00min   |

**Table S6:** Yeast mass spectrometry (Solvent Composition).

| Column Mode           | Solvent A                                                                                                                                                                                                                                    | Solvent B                                                                                                                                                 |
|-----------------------|----------------------------------------------------------------------------------------------------------------------------------------------------------------------------------------------------------------------------------------------|-----------------------------------------------------------------------------------------------------------------------------------------------------------|
| Water's Positive Mode | Grade water (Water, Optima™ LC/MS Grade, Cat. No. W6500, Fisher Chemical™, Fair Lawn, NJ, USA) + 0.1% formic acid (FA) (Formic Acid, 99.0 + %, Optima LC/MS grade, Cat. No. A117-50, Fisher Chemical, Fisher Scientific, Fair Lawn, NJ, USA) | 100% Acetonitrile (ACN) (Acetonitrile, Optima LC/MS grade, Cat. No. A955, Fisher Chemical, Fisher Scientific, Fair Lawn, NJ, USA) + 0.1% formic acid (FA) |
| Water's Negative Mode | 20 mM Ammonium acetate (Ammonium Acetate (Optima LC/MS), Cat. No. A11450 Fisher Chemical, Fisher Scientific, Fair Lawn, NJ, USA) pH 9 in water                                                                                               | 20 mM Ammonium acetate (Ammonium Acetate (Optima LC/MS), Cat. No. A11450 Fisher Chemical, Fisher Scientific, Fair Lawn, NJ, USA) pH 9 in Acetonitrile     |

| Timetable |           |                            |                                        |
|-----------|-----------|----------------------------|----------------------------------------|
| Time      | Function  | Parameter                  | Solvent_composition                    |
| 1         | 3.00 min  | Change Solvent Composition | Solvent Composition A:70.00% B:30.00 % |
| 2         | 3.00 min  | Change Flow                | Flow: 0.3 mL/min                       |
| 3         | 12.00 min | Change Solvent Composition | Solvent Composition A:98.00% B:2.00 %  |
| 4         | 12.00 min | Change Flow                | Flow: 0.3 mL/min                       |
| 5         | 15.00 min | Change Solvent Composition | Solvent Composition A:98.00% B:2.00 %  |
| 6         | 15.00 min | Change Flow                | Flow: 0.3 mL/min                       |
| 7         | 16.00 min | Change Solvent Composition | Solvent Composition A:15.00% B:85.00 % |
| 8         | 16.00 min | Change Flow                | Flow: 0.3 mL/min                       |
| 9         | 23.00 min | Change Solvent Composition | Solvent Composition A:15.00% B:85.00 % |
| 10        | 23.00 min | Change Flow                | Flow: 0.3 mL/min                       |

**Table S7:** Q-PCR melt curve results.

| Well | Target Name  | Tm     | Melt Peak Height |
|------|--------------|--------|------------------|
| 1    | SC_ctrl_ALG9 | 78.472 | 33,664.000       |
| 2    | SC_ctrl_ALG9 | 78.472 | 35,361.316       |
| 3    | SC_ctrl_ALG9 | 78.359 | 30,643.055       |
| 4    | SC_ctrl_ALG9 | 78.472 | 31,334.941       |
| 5    | SC_mut_ALG9  | 78.359 | 32,732.633       |
| 6    | SC_mut_ALG9  | 78.359 | 40,384.113       |
| 7    | SC_mut_ALG9  | 78.472 | 35,623.656       |
| 8    | SC_mut_ALG9  | 78.359 | 33,932.109       |
| 9    | SC_ctrl_CIT3 | 80.511 | 36,493.750       |
| 10   | SC_ctrl_CIT3 | 80.624 | 25,483.025       |
| 11   | SC_ctrl_CIT3 | 80.511 | 28,394.873       |
| 12   | SC_ctrl_CIT3 | 80.964 | 8,798.745        |
| 13   | SC_mut_CIT3  | 80.511 | 28,166.035       |
| 14   | SC_mut_CIT3  | 80.511 | 21,052.998       |
| 15   | SC_mut_CIT3  | 80.511 | 25,464.791       |
| 16   | SC_mut_CIT3  | 80.511 | 24,980.783       |
| 17   | SC_ctrl_MIH1 | 77.113 | 68,102.141       |
| 18   | SC_ctrl_MIH1 | 76.999 | 61,921.539       |
| 19   | SC_ctrl_MIH1 | 76.999 | 51,552.285       |
| 20   | SC_ctrl_MIH1 | 77.113 | 55,044.328       |
| 21   | Sc_mut_MIH1  | 76.773 | 36,258.695       |
| 22   | Sc_mut_MIH1  | 76.659 | 30,236.443       |
| 23   | Sc_mut_MIH1  | 76.773 | 29,325.252       |
| 24   | Sc_mut_MIH1  | 76.546 | 23,707.949       |
| 25   | Sc_ctrl_FAA2 | 77.226 | 34,361.215       |
| 26   | Sc_ctrl_FAA2 | 77.226 | 31,186.855       |
| 27   | Sc_ctrl_FAA2 | 77.226 | 23,374.393       |
| 28   | SC_mut_FAA2  | 77.226 | 22,494.443       |
| 29   | SC_mut_FAA2  | 77.226 | 29,181.404       |
| 30   | SC_mut_FAA2  | 77.113 | 19,344.182       |
| 31   | SC_mut_FAA2  | 77.226 | 26,075.854       |

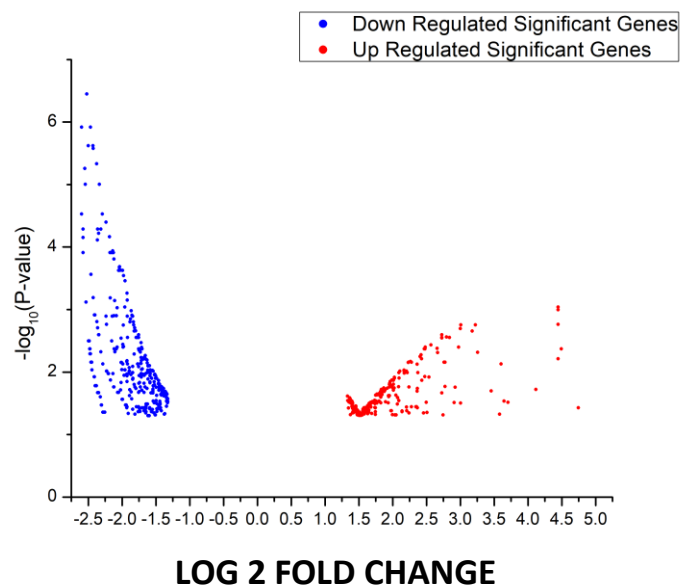

|    | Name                                        | Total | Hits | Enrichment Score | Pval     | Padj     |
|----|---------------------------------------------|-------|------|------------------|----------|----------|
| 1  | Oxidative phosphorylation                   | 72    | 42   | 0.409775486      | 0.045752 | 0.544538 |
| 2  | Ubiquitin mediated proteolysis              | 47    | 33   | 0.462418922      | 0.046668 | 0.544538 |
| 3  | Peroxisome                                  | 39    | 28   | 0.460739276      | 0.05137  | 0.544538 |
| 4  | RNA degradation                             | 62    | 42   | 0.423299147      | 0.060732 | 0.544538 |
| 5  | Basal transcription factors                 | 32    | 23   | 0.468586572      | 0.06281  | 0.544538 |
| 6  | N-Glycan biosynthesis                       | 31    | 21   | 0.476105686      | 0.065546 | 0.544538 |
| 7  | Cysteine and methionine metabolism          | 40    | 26   | -0.432035361     | 0.072864 | 0.544538 |
| 8  | Various types of N-glycan biosynthesis      | 30    | 21   | 0.464906245      | 0.080672 | 0.544538 |
| 9  | RNA polymerase                              | 30    | 21   | -0.438799753     | 0.110565 | 0.663391 |
| 10 | Glycine, serine and threonine metabolism    | 31    | 27   | -0.37219147      | 0.175309 | 0.879288 |
| 11 | Protein processing in endoplasmic reticulum | 88    | 67   | 0.324227886      | 0.1792   | 0.879288 |
| 12 | Proteasome                                  | 35    | 25   | 0.3786746        | 0.224832 | 0.879288 |
| 13 | Nucleotide excision repair                  | 37    | 27   | 0.377207882      | 0.227806 | 0.879288 |
| 14 | Biosynthesis of secondary metabolites       | 300   | 199  | -0.224054013     | 0.251012 | 0.879288 |
| 15 | MAPK signaling pathway - yeast              | 114   | 78   | 0.291927513      | 0.256881 | 0.879288 |
| 16 | Biosynthesis of antibiotics                 | 229   | 153  | -0.23132219      | 0.263538 | 0.879288 |
| 17 | Methane metabolism                          | 26    | 20   | 0.390863235      | 0.293919 | 0.879288 |
| 18 | Citrate cycle (TCA cycle)                   | 32    | 20   | -0.35393291      | 0.309756 | 0.879288 |
| 19 | Homologous recombination                    | 20    | 16   | 0.397133247      | 0.336222 | 0.879288 |
| 20 | Ribosome                                    | 183   | 123  | 0.255747186      | 0.340087 | 0.879288 |

**Table S8 :**Volcano plot for differentially expressed significant genes (yeast transcriptomics). Gene Set Enrichment analysis from RNA sequencing of yeast transformed with TDP-43 and its mutant.



| Term                                        | P-value     | Adjusted P-value | Genes                                                                                                             |
|---------------------------------------------|-------------|------------------|-------------------------------------------------------------------------------------------------------------------|
| Ribosome                                    | 8.42209E-14 | 4.46371E-12      | RPL23A;RPL22A;RPS4A;RPL22B;RPL33B;RPL20A;RPL20B;RPL6A;RPS23A;RPL8B;RPS14B;RPS16B;RPS26A;RPL16A;RPS11B;RPS9B;RPL8A |
| Valine, leucine and isoleucine biosynthesis | 0.000123292 | 0.002178166      | ILV3;BAT1;LEU9                                                                                                    |
| Glyoxylate and dicarboxylate metabolism     | 0.000113579 | 0.002178166      | FDH1;GCV2;CIT3;CTA1                                                                                               |
| Peroxisome                                  | 0.000321299 | 0.004257216      | DCI1;FAA2;POX1;CTA1                                                                                               |
| ABC transporters                            | 0.001449674 | 0.011983393      | PDR5;SNQ2                                                                                                         |
| MAPK signaling pathway                      | 0.000418369 | 0.004434716      | PTP2;MKC7;RLM1;SST2;CTA1;MCM1                                                                                     |
| Pyrimidine metabolism                       | 0.0016624   | 0.011983393      | URA7;URA2;FUR1                                                                                                    |
| Glycine, serine and threonine metabolism    | 0.002034916 | 0.011983393      | THR4;SER2;GCV2                                                                                                    |
| RNA polymerase                              | 0.002034916 | 0.011983393      | RPA49;RPC19;RPA43                                                                                                 |
| Pantothenate and CoA biosynthesis           | 0.006933521 | 0.036747662      | ILV3;BAT1                                                                                                         |
| Thiamine metabolism                         | 0.011044769 | 0.048781064      | PHO12;THI80                                                                                                       |
| Fatty acid degradation                      | 0.011044769 | 0.048781064      | FAA2;POX1                                                                                                         |
| Methane metabolism                          | 0.018746714 | 0.076428912      | SER2;FDH1                                                                                                         |
| Alanine, aspartate and glutamate metabolism | 0.028116413 | 0.093135617      | URA2;ASN1                                                                                                         |
| Meiosis                                     | 0.024587792 | 0.090778446      | PDS1;HXT3;SNF3;REC8                                                                                               |
| Cysteine and methionine metabolism          | 0.040912737 | 0.12046528       | BAT1;SAM4                                                                                                         |
| Ribosome biogenesis in eukaryotes           | 0.025692013 | 0.090778446      | RCL1;UTP10;UTP21                                                                                                  |

**Table S9:** Pathway enrichment analysis from RNA sequencing of yeast transformed with TDP-43 and its mutant.

GSEA

Enrichr

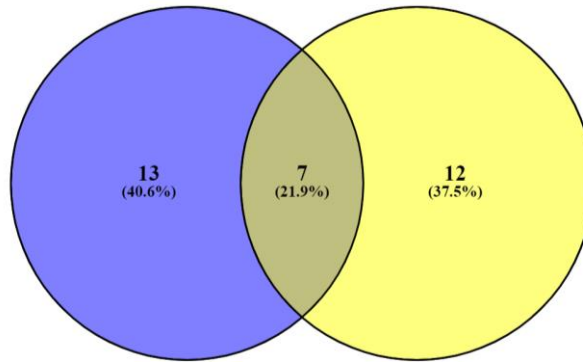

| Names            | Total | Elements                                    |
|------------------|-------|---------------------------------------------|
| Enrichr and GSEA | 7     | RNA POLYMERASE                              |
|                  |       | METHANE METABOLISM                          |
|                  |       | PEROXISOME                                  |
|                  |       | RIBOSOME                                    |
|                  |       | NUCLEOTIDE EXCISION REPAIR                  |
|                  |       | CYSTEINE AND METHIONINE METABOLISM          |
|                  |       | GLYCINE, SERINE AND THREONINE METABOLISM    |
| GSEA             | 13    | PROTEASOME                                  |
|                  |       | OXIDATIVE PHOSPHORYLATION                   |
|                  |       | BIOSYNTHESIS OF ANTIBIOTICS                 |
|                  |       | VARIOUS TYPES OF N-GLYCAN BIOSYNTHESIS      |
|                  |       | HOMOLOGOUS RECOMBINATION                    |
|                  |       | BASAL TRANSCRIPTION FACTORS                 |
|                  |       | CITRATE CYCLE (TCA CYCLE)                   |
|                  |       | RNA DEGRADATION                             |
|                  |       | MAPK SIGNALING PATHWAY - YEAST              |
|                  |       | BIOSYNTHESIS OF SECONDARY METABOLITES       |
|                  |       | UBIQUITIN MEDIATED PROTEOLYSIS              |
|                  |       | N-GLYCAN BIOSYNTHESIS                       |
|                  |       | PROTEIN PROCESSING IN ENDOPLASMIC RETICULUM |
| Enrichr          | 12    | HIPPO SIGNALING PATHWAY                     |
|                  |       | MEIOSIS                                     |
|                  |       | PYRIMIDINE METABOLISM                       |
|                  |       | VALINE, LEUCINE AND ISOLEUCINE BIOSYNTHESIS |
|                  |       | ALANINE, ASPARTATE AND GLUTAMATE METABOLISM |
|                  |       | ABC TRANSPORTERS                            |
|                  |       | GLYOXYLATE AND DICARBOXYLATE METABOLISM     |
|                  |       | MAPK SIGNALING PATHWAY                      |
|                  |       | PANTOTHENATE AND COA BIOSYNTHESIS           |
|                  |       | FATTY ACID DEGRADATION                      |
|                  |       | THIAMINE METABOLISM                         |
|                  |       | RIBOSOME BIOGENESIS IN EUKARYOTES           |

**Table S10:** Venn diagram representing common pathways enriched between GSEA and Enrichr (Yeast transcriptomics).

| Pathways                                    | Total | Expected | Hits | Raw p      | (-LOG10(p)) | Holm adjust | FDR       | Impact  |
|---------------------------------------------|-------|----------|------|------------|-------------|-------------|-----------|---------|
| Glycine, serine and threonine metabolism    | 34    | 1.0385   | 7    | 4.49E-05   | 4.3477      | 0.0037718   | 0.0037718 | 0.38273 |
| Citrate cycle (TCA cycle)                   | 20    | 0.61089  | 5    | 0.00023468 | 3.6295      | 0.019478    | 0.0098564 | 0.24531 |
| Glyoxylate and dicarboxylate metabolism     | 32    | 0.97742  | 5    | 0.0023142  | 2.6356      | 0.18976     | 0.064796  | 0.24075 |
| Alanine, aspartate and glutamate metabolism | 28    | 0.85525  | 4    | 0.0091196  | 2.04        | 0.73869     | 0.15321   | 0.04808 |
| Glutathione metabolism                      | 28    | 0.85525  | 4    | 0.0091196  | 2.04        | 0.73869     | 0.15321   | 0.35188 |
| Purine metabolism                           | 66    | 2.0159   | 6    | 0.013232   | 1.8784      | 1           | 0.18524   | 0.17015 |
| beta-Alanine metabolism                     | 21    | 0.64143  | 3    | 0.024129   | 1.6175      | 1           | 0.28718   | 0.05597 |
| Pyruvate metabolism                         | 22    | 0.67198  | 3    | 0.027351   | 1.563       | 1           | 0.28718   | 0.23794 |
| Glycolysis / Gluconeogenesis                | 26    | 0.79416  | 3    | 0.042418   | 1.3724      | 1           | 0.3959    | 0.20615 |
| Arginine biosynthesis                       | 14    | 0.42762  | 2    | 0.065791   | 1.1818      | 1           | 0.55265   | 0.20305 |
| Cysteine and methionine metabolism          | 33    | 1.008    | 3    | 0.0768     | 1.1146      | 1           | 0.58647   | 0.05983 |
| Arginine and proline metabolism             | 38    | 1.1607   | 3    | 0.10695    | 0.9708      | 1           | 0.74868   | 0.03401 |
| Riboflavin metabolism                       | 4     | 0.12218  | 1    | 0.1168     | 0.93254     | 1           | 0.75474   | 0       |
| Pentose phosphate pathway                   | 22    | 0.67198  | 2    | 0.1434     | 0.84344     | 1           | 0.84045   | 0       |
| Propanoate metabolism                       | 23    | 0.70252  | 2    | 0.15413    | 0.81212     | 1           | 0.84045   | 0.04061 |
| D-Glutamine and D-glutamate metabolism      | 6     | 0.18327  | 1    | 0.17009    | 0.76932     | 1           | 0.84045   | 0       |
| Nitrogen metabolism                         | 6     | 0.18327  | 1    | 0.17009    | 0.76932     | 1           | 0.84045   | 0       |
| Thiamine metabolism                         | 7     | 0.21381  | 1    | 0.19554    | 0.70876     | 1           | 0.91253   | 0       |
| Valine, leucine and isoleucine biosynthesis | 8     | 0.24436  | 1    | 0.22023    | 0.65713     | 1           | 0.97364   | 0       |
| Biotin metabolism                           | 10    | 0.30544  | 1    | 0.2674     | 0.57284     | 1           | 1         | 0       |
| Glycerophospholipid metabolism              | 36    | 1.0996   | 2    | 0.30167    | 0.52047     | 1           | 1         | 0.00937 |
| Pyrimidine metabolism                       | 39    | 1.1912   | 2    | 0.33602    | 0.47363     | 1           | 1         | 0.06137 |
| Tryptophan metabolism                       | 41    | 1.2523   | 2    | 0.35869    | 0.44528     | 1           | 1         | 0.14484 |
| Tyrosine metabolism                         | 42    | 1.2829   | 2    | 0.36993    | 0.43188     | 1           | 1         | 0.11085 |
| Butanoate metabolism                        | 15    | 0.45817  | 1    | 0.37345    | 0.42777     | 1           | 1         | 0       |
| Nicotinate and nicotinamide metabolism      | 15    | 0.45817  | 1    | 0.37345    | 0.42777     | 1           | 1         | 0.1943  |
| Glycerolipid metabolism                     | 16    | 0.48871  | 1    | 0.39278    | 0.40585     | 1           | 1         | 0.09346 |
| Aminoacyl-tRNA biosynthesis                 | 48    | 1.4661   | 2    | 0.43565    | 0.36087     | 1           | 1         | 0       |
| Pantothenate and CoA biosynthesis           | 19    | 0.58035  | 1    | 0.44733    | 0.34937     | 1           | 1         | 0.00714 |
| Lysine degradation                          | 25    | 0.76361  | 1    | 0.54245    | 0.26564     | 1           | 1         | 0       |
| Phosphatidylinositol signaling system       | 28    | 0.85525  | 1    | 0.5838     | 0.23374     | 1           | 1         | 0.03053 |
| Porphyrin and chlorophyll metabolism        | 30    | 0.91633  | 1    | 0.60931    | 0.21516     | 1           | 1         | 0       |
| Inositol phosphate metabolism               | 30    | 0.91633  | 1    | 0.60931    | 0.21516     | 1           | 1         | 0.02867 |
| Primary bile acid biosynthesis              | 46    | 1.405    | 1    | 0.76521    | 0.11622     | 1           | 1         | 0.02239 |

**Table S11:** Results obtained from Pathway Enrichment Analysis of metabolomic datasets pertaining to ALS A315T mutant TDP-43 Mice Motor Neuron using KEGG DATABASE.

|                                                     | Total | Expected | Hits | Raw p    | #NAME?   | Holm<br>adjust | FDR      | Impact  |
|-----------------------------------------------------|-------|----------|------|----------|----------|----------------|----------|---------|
| Aminoacyl-tRNA biosynthesis                         | 48    | 1.1768   | 13   | 1.34E-11 | 10.873   | 1.13E-09       | 1.13E-09 | 0       |
| Glyoxylate and dicarboxylate metabolism             | 32    | 0.78452  | 6    | 8.22E-05 | 4.0851   | 0.006824       | 0.003453 | 0.21694 |
| Arginine biosynthesis                               | 14    | 0.34323  | 4    | 0.000258 | 3.5879   | 0.021181       | 0.007233 | 0.2538  |
| Glutathione metabolism                              | 28    | 0.68645  | 5    | 0.000441 | 3.356    | 0.035687       | 0.009252 | 0.12267 |
| Valine, leucine and isoleucine biosynthesis         | 8     | 0.19613  | 3    | 0.0007   | 3.1548   | 0.056014       | 0.011763 | 0       |
| Arginine and proline metabolism                     | 38    | 0.93161  | 5    | 0.00188  | 2.7258   | 0.14854        | 0.026324 | 0.44097 |
| Phenylalanine, tyrosine and tryptophan biosynthesis | 4     | 0.098065 | 2    | 0.003406 | 2.4678   | 0.26564        | 0.040867 | 1       |
| Alanine, aspartate and glutamate metabolism         | 28    | 0.68645  | 4    | 0.004125 | 2.3846   | 0.31764        | 0.043314 | 0.3109  |
| Nitrogen metabolism                                 | 6     | 0.1471   | 2    | 0.008253 | 2.0834   | 0.62723        | 0.069325 | 0       |
| D-Glutamine and D-glutamate metabolism              | 6     | 0.1471   | 2    | 0.008253 | 2.0834   | 0.62723        | 0.069325 | 0.5     |
| Citrate cycle (TCA cycle)                           | 20    | 0.49032  | 3    | 0.011624 | 1.9346   | 0.8602         | 0.088768 | 0.16809 |
| Phenylalanine metabolism                            | 10    | 0.24516  | 2    | 0.023271 | 1.6332   | 1              | 0.1629   | 0.35714 |
| Glycine, serine and threonine metabolism            | 33    | 0.80903  | 3    | 0.044701 | 1.3497   | 1              | 0.28884  | 0.26997 |
| Butanoate metabolism                                | 15    | 0.36774  | 2    | 0.050279 | 1.2986   | 1              | 0.30167  | 0       |
| Propanoate metabolism                               | 23    | 0.56387  | 2    | 0.10726  | 0.96955  | 1              | 0.60067  | 0       |
| Galactose metabolism                                | 27    | 0.66194  | 2    | 0.14011  | 0.85353  | 1              | 0.73558  | 0.03888 |
| Porphyrin and chlorophyll metabolism                | 30    | 0.73548  | 2    | 0.16602  | 0.77985  | 1              | 0.82032  | 0       |
| Ascorbate and aldarate metabolism                   | 8     | 0.19613  | 1    | 0.18047  | 0.74359  | 1              | 0.84221  | 0       |
| Ubiquinone and other terpenoid-quinone biosynthesis | 9     | 0.22065  | 1    | 0.20067  | 0.69752  | 1              | 0.88152  | 0       |
| Biosynthesis of unsaturated fatty acids             | 36    | 0.88258  | 2    | 0.21996  | 0.65766  | 1              | 0.88152  | 0       |
| Biotin metabolism                                   | 10    | 0.24516  | 1    | 0.22038  | 0.65683  | 1              | 0.88152  | 0       |
| Valine, leucine and isoleucine degradation          | 40    | 0.98065  | 2    | 0.25678  | 0.59044  | 1              | 0.98042  | 0       |
| Tyrosine metabolism                                 | 42    | 1.0297   | 2    | 0.27528  | 0.56023  | 1              | 1        | 0.22844 |
| Primary bile acid biosynthesis                      | 46    | 1.1277   | 2    | 0.31224  | 0.50552  | 1              | 1        | 0.05823 |
| Fatty acid biosynthesis                             | 47    | 1.1523   | 2    | 0.32144  | 0.49291  | 1              | 1        | 0.01473 |
| Histidine metabolism                                | 16    | 0.39226  | 1    | 0.32908  | 0.4827   | 1              | 1        | 0       |
| Glycerolipid metabolism                             | 16    | 0.39226  | 1    | 0.32908  | 0.4827   | 1              | 1        | 0.09346 |
| Starch and sucrose metabolism                       | 18    | 0.44129  | 1    | 0.36192  | 0.44139  | 1              | 1        | 0.05023 |
| Pantothenate and CoA biosynthesis                   | 19    | 0.46581  | 1    | 0.37775  | 0.4228   | 1              | 1        | 0       |
| Pentose phosphate pathway                           | 22    | 0.53935  | 1    | 0.42297  | 0.37369  | 1              | 1        | 0       |
| Lysine degradation                                  | 25    | 0.6129   | 1    | 0.46498  | 0.33256  | 1              | 1        | 0       |
| Glycolysis / Gluconeogenesis                        | 26    | 0.63742  | 1    | 0.47832  | 0.32029  | 1              | 1        | 0.00021 |
| Purine metabolism                                   | 65    | 1.5935   | 2    | 0.47937  | 0.31933  | 1              | 1        | 0.00528 |
| Phosphatidylinositol signaling system               | 28    | 0.68645  | 1    | 0.50402  | 0.29756  | 1              | 1        | 0.03736 |
| Inositol phosphate metabolism                       | 30    | 0.73548  | 1    | 0.52848  | 0.27697  | 1              | 1        | 0.12939 |
| Cysteine and methionine metabolism                  | 33    | 0.80903  | 1    | 0.56299  | 0.2495   | 1              | 1        | 0.10446 |
| Glycerophospholipid metabolism                      | 36    | 0.88258  | 1    | 0.59504  | 0.22546  | 1              | 1        | 0.01324 |
| Fatty acid elongation                               | 39    | 0.95613  | 1    | 0.62479  | 0.20427  | 1              | 1        | 0       |
| Fatty acid degradation                              | 39    | 0.95613  | 1    | 0.62479  | 0.20427  | 1              | 1        | 0       |
| Pyrimidine metabolism                               | 39    | 0.95613  | 1    | 0.62479  | 0.20427  | 1              | 1        | 0       |
| Tryptophan metabolism                               | 41    | 1.0052   | 1    | 0.64343  | 0.1915   | 1              | 1        | 0.14305 |
| Steroid biosynthesis                                | 42    | 1.0297   | 1    | 0.65241  | 0.18548  | 1              | 1        | 0.0282  |
| Steroid hormone biosynthesis                        | 85    | 2.0839   | 1    | 0.88582  | 0.052656 | 1              | 1        | 0.00528 |

**Table S12:** Results obtained from Pathway Enrichment Analysis of metabolomic datasets pertaining to ALS Patient CSF using KEGG DATABASE.

| Pathways                                    | Total | Expected | Hits | Raw p    | FDR    | Impact  |
|---------------------------------------------|-------|----------|------|----------|--------|---------|
| Fatty acid degradation                      | 45    | 1.5222   | 5    | 0.015808 | 0.9539 | 0.29545 |
| Glycine, serine and threonine metabolism    | 32    | 1.0825   | 4    | 0.020655 | 0.9539 | 0.45161 |
| Glycerolipid metabolism                     | 63    | 2.1311   | 5    | 0.057673 | 0.9539 | 0.19355 |
| Glyoxylate and dicarboxylate metabolism     | 46    | 1.556    | 4    | 0.066387 | 0.9539 | 0.26667 |
| Alanine, aspartate and glutamate metabolism | 31    | 1.0486   | 3    | 0.084174 | 0.9539 | 0.2     |
| Pyruvate metabolism                         | 138   | 4.6681   | 8    | 0.086622 | 0.7539 | 0.26277 |
| Sulfur metabolism                           | 37    | 1.2516   | 3    | 0.12661  | 0.7539 | 0.38889 |
| Lysine biosynthesis                         | 21    | 0.71036  | 2    | 0.15675  | 0.7539 | 0.4     |
| Aminoacyl-t-RNA biosynthesis                | 41    | 1.3869   | 3    | 0.15843  | 0.7539 | 0.4     |
| Cyanoamino acid metabolism                  | 49    | 1.6575   | 3    | 0.22822  | 0.7539 | 0.125   |
| Beta-alanine metabolism                     | 73    | 2.4693   | 4    | 0.23061  | 0.7539 | 0.19444 |
| Fructose and mannose metabolism             | 28    | 0.94715  | 2    | 0.2441   | 0.7539 | 0.18519 |
| Valine, leucine and isoleucine degradation  | 51    | 1.7252   | 3    | 0.24657  | 0.7539 | 0.36    |
| Valine, leucine and isoleucine biosynthesis | 32    | 1.0825   | 2    | 0.29523  | 0.7539 | 0.12903 |
| Glutathione metabolism                      | 34    | 1.1501   | 2    | 0.3207   | 0.7539 | 0.18182 |
| Methane metabolism                          | 36    | 1.2178   | 2    | 0.34597  | 0.7539 | 0.17143 |
| Histidine metabolism                        | 38    | 1.2854   | 2    | 0.37096  | 0.7539 | 0.54054 |
| Thiamine metabolism                         | 39    | 1.3192   | 2    | 0.38333  | 0.7539 | 0.10526 |

**Table S13:** Results obtained from integrated pathway analysis (RNA sequencing and metabolomics) of yeast transformed with TDP-43 and its mutant.

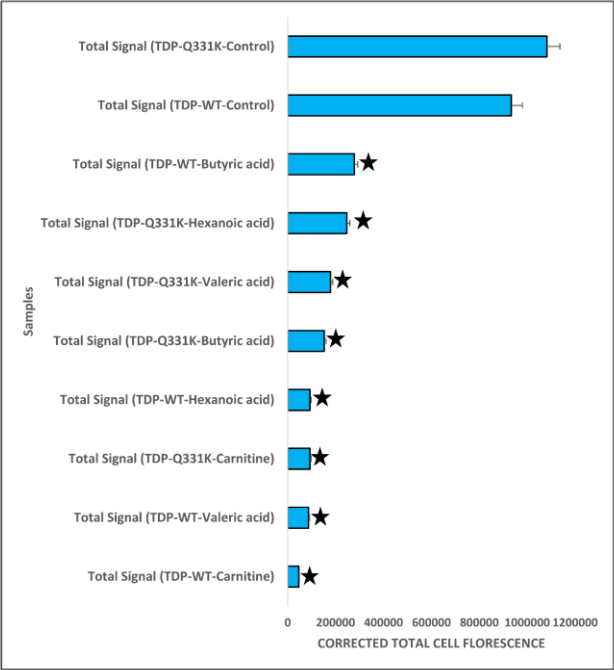

| SAMPLES                                | CTCF_1      | CTCF_2      | CTCF_3   | CTCF_4   | T.test      | Mean     |
|----------------------------------------|-------------|-------------|----------|----------|-------------|----------|
| Total Signal (TDP-WT-Control)          | 891565.0833 | 820153.375  | 1068544  | 953856.6 |             | 933529.8 |
| Total Signal (TDP-Q331K-Control)       | 991157.8521 | 892776.425  | 1108310  | 1335619  |             | 1081966  |
| Total Signal (TDP-WT-Butyric acid)     | 240216.4167 | 242642.6667 | 393567.1 | 236025.6 | 5.63449E-05 | 278112.9 |
| Total Signal (TDP-Q331K-Butyric acid)  | 156961.25   | 143111.3333 | 150896.1 | 159179.2 | 6.72232E-05 | 152537   |
| Total Signal (TDP-WT-Valeric acid)     | 90716.66667 | 88522.25    | 85266.33 | 83051.83 | 3.68474E-06 | 86889.27 |
| Total Signal (TDP-Q331K-Valeric acid)  | 284426.6667 | 152353.0833 | 135702   | 143482.2 | 0.000113416 | 178991   |
| Total Signal (TDP-WT-Hexanoic acid)    | 101813.5    | 105317.6667 | 85137.25 | 80410.75 | 3.99237E-06 | 93169.79 |
| Total Signal (TDP-Q331K-Hexanoic acid) | 358425.8333 | 255500.1667 | 191006.8 | 182997.9 | 0.000195224 | 246982.7 |
| Total Signal (TDP-WT-Carnitine)        | 54300.66667 | 42711.5     | 44109.25 | 44759.5  | 2.81245E-06 | 46470.23 |
| Total Signal (TDP-Q331K-Carnitine)     | 96192.83333 | 99442.83333 | 87927.58 | 88155.92 | 4.70857E-05 | 92929.79 |

**Table S14:** Bar graph and table representing results obtained from fluorescence quantification (Total Cell fluorescence) of for TDP-43 transformed yeast cells treated with short chain fattyacids. [ P-VALUE<0.05 ★ ]

| SAMPLES                                | Ratio_1     | Ratio_2     | Ratio_3  | Ratio_4  | Mean     |
|----------------------------------------|-------------|-------------|----------|----------|----------|
| Total Signal (TDP-WT-Control)          | 1.014612089 | 1.035257843 | 1.050863 | 1.152909 | 1.06341  |
| Total Signal (TDP-Q331K-Control)       | 1.034097271 | 1.053355261 | 1.241007 | 1.266407 | 1.148717 |
| Total Signal (TDP-WT-Butyric acid)     | 1           | 1.011324277 | 1        | 1        | 1.002831 |
| Total Signal (TDP-Q331K-Butyric acid)  | 1           | 1           | 1        | 1        | 1        |
| Total Signal (TDP-WT-Valeric acid)     | 1           | 1           | 1        | 1        | 1        |
| Total Signal (TDP-Q331K-Valeric acid)  | 1           | 1           | 1        | 1        | 1        |
| Total Signal (TDP-WT-Hexanoic acid)    | 1           | 1           | 1        | 1        | 1        |
| Total Signal (TDP-Q331K-Hexanoic acid) | 1           | 1           | 1        | 1        | 1        |
| Total Signal (TDP-WT-Carnitine)        | 1           | 1           | 1        | 1        | 1        |
| Total Signal (TDP-Q331K-Carnitine)     | 1           | 1           | 1        | 1        | 1        |

**Table S15:** Table representing results of ratios obtained between Total cell fluorescence and aggregate fluorescence for TDP-43 transformed yeast cells treated with short chain fattyacids.

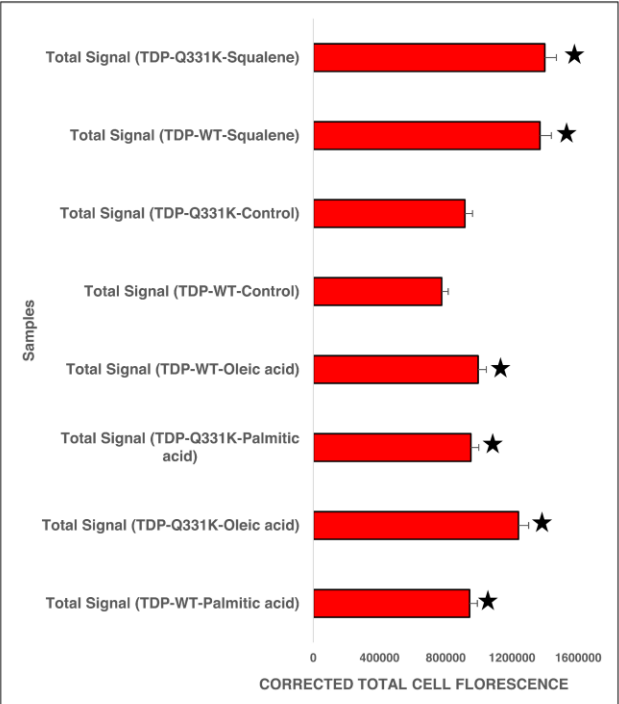

| SAMPLES                                | CTCF_1       | CTCF_2      | CTCF_3  | CTCF_4   | T.test       | Mean      |
|----------------------------------------|--------------|-------------|---------|----------|--------------|-----------|
| Total Signal (TDP-WT-Control)          | 8,91,565.08  | 820153.375  | 1068544 | 953856.6 |              | 933529.8  |
| Total Signal (TDP-Q331K-Control)       | 10,62,307.25 | 1061798.5   | 1108310 | 1335619  |              | 1142009   |
| Total Signal (TDP-WT-Palmitic acid)    | 14,79,771.83 | 1440714.833 | 1334150 | 1433519  | 0.0002041    | 1422039   |
| Total Signal (TDP-Q331K-Palmitic acid) | 15,21,101.08 | 1481171.5   | 1557093 | 1476803  | 0.001682246  | 1509042   |
| Total Signal (TDP-WT-Oleic acid)       | 11,46,026.00 | 1207783.833 | 1196998 | 1151576  | 0.004533494  | 1175596   |
| Total Signal (TDP-Q331K-Oleic acid)    | 12,55,279.58 | 1316697.5   | 1311766 | 1467343  | 12,55,279.58 | 1316697.5 |
| Total Signal (TDP-WT-Squalene)         | 16,19,724.67 | 1669217.917 | 2363144 | 2155367  | 0.001737097  | 1951863   |
| Total Signal (TDP-Q331K-Squalene)      | 16,74,394.67 | 1687129.378 | 2339941 | 2215607  | 0.004109394  | 1979268   |

**Table S16:** Bar graph and table representing results obtained from fluorescence quantification (Total Cell fluorescence) of for TDP-43 transformed yeast cells treated with long chain fattyacids. [ P-VALUE<0.05★ ]

| SAMPLES                                | Ratio_1     | Ratio_2     | Ratio_3  | Ratio_4  | Mean        |
|----------------------------------------|-------------|-------------|----------|----------|-------------|
| Total Signal (TDP-WT-Control)          | 1.013614067 | 1.035257843 | 1.050863 | 1.122216 | 1.055487772 |
| Total Signal (TDP-Q331K-Control)       | 1.108329037 | 1.108155463 | 1.241007 | 1.238492 | 1.173995743 |
| Total Signal (TDP-WT-Palmitic acid)    | 1.309945576 | 1.055929819 | 1.054309 | 1.120912 | 1.135274053 |
| Total Signal (TDP-Q331K-Palmitic acid) | 1.427402014 | 1.130670518 | 1.185807 | 1.217045 | 1.24023116  |
| Total Signal (TDP-WT-Oleic acid)       | 1.028540606 | 1.015492252 | 1.058989 | 1.053673 | 1.039173551 |
| Total Signal (TDP-Q331K-Oleic acid)    | 1.004076382 | 1.006193332 | 1.110198 | 1.017824 | 1.034572979 |
| Total Signal (TDP-WT-Squalene)         | 1.078263745 | 1.083709099 | 1.198555 | 1.202553 | 1.140770349 |
| Total Signal (TDP-Q331K-Squalene)      | 1.190447148 | 1.284831157 | 1.136518 | 1.120141 | 1.182984267 |

**Table S17:** Table representing results of ratios obtained between Total cell fluorescence and aggregate fluorescence for TDP-43 transformed yeast cells treated with long chain fattyacids.

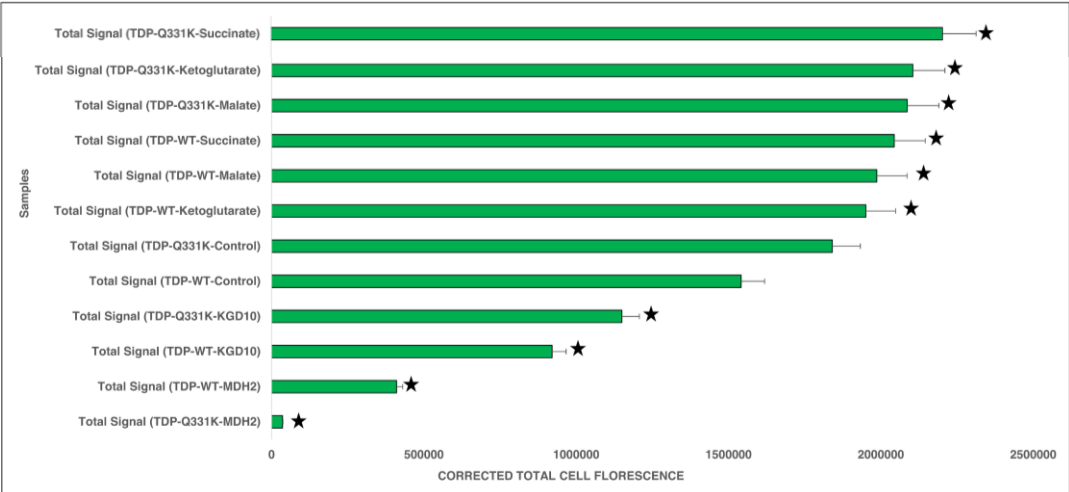

**Table S18:** Bar graph representing results obtained from fluorescence quantification (Total Cell fluorescence) of for TDP-43 transformed yeast cells treated with TCA cycle metabolites and knock-outs. [ P-VALUE<0.05 ★ ]

| SAMPLES                                | CTCF_1       | CTCF_2       | CTCF_3       | CTCF_4       | T.test      | Mean        |
|----------------------------------------|--------------|--------------|--------------|--------------|-------------|-------------|
| Total Signal (TDP-WT-Control)          | 14,35,512.58 | 15,05,059.56 | 15,82,521.00 | 16,41,610.00 |             | 1541175.785 |
| Total Signal (TDP-Q331K-Control)       | 17,77,243.92 | 19,18,254.08 | 17,72,910.58 | 18,93,865.08 |             | 1840568.417 |
| Total Signal (TDP-WT-Citrate)          | 20,67,983.42 | 21,52,615.08 | 21,57,146.58 | 22,35,757.25 | 3.6734E-05  | 2153375.583 |
| Total Signal (TDP-Q331K-Citrate)       | 19,00,663.08 | 23,38,854.42 | 22,27,943.75 | 22,71,074.00 | 0.016611891 | 2184633.813 |
| Total Signal (TDP-WT-Ketoglutarate)    | 17,82,512.58 | 20,77,940.08 | 19,32,205.00 | 20,09,812.42 | 0.001892746 | 1950617.521 |
| Total Signal (TDP-Q331K-Ketoglutarate) | 18,00,222.92 | 22,73,555.25 | 21,79,163.75 | 21,66,871.42 | 0.054774127 | 2104953.333 |
| Total Signal (TDP-WT-Succinate)        | 18,60,447.25 | 21,38,521.08 | 19,75,440.42 | 21,99,872.08 | 0.001355415 | 2043570.208 |
| Total Signal (TDP-Q331K-Succinate)     | 19,24,524.33 | 23,43,181.75 | 23,79,615.08 | 21,65,094.25 | 0.016985664 | 2203103.854 |
| Total Signal (TDP-WT-Malate)           | 16,16,355.22 | 19,90,769.25 | 21,72,199.42 | 21,66,565.75 | 0.261879837 | 1986472.41  |
| Total Signal (TDP-Q331K-Malate)        | 17,76,731.06 | 20,32,291.75 | 22,80,681.25 | 22,55,936.92 | 0.543343782 | 2086410.243 |
| Total Signal (TDP-WT-MDH2)             | 5,09,289.89  | 3,70,572.25  | 3,48,025.08  | 4,12,905.58  | 7.25477E-07 | 410198.2014 |
| Total Signal (TDP-Q331K-MDH2)          | 13,137.30    | 40,837.83    | 38,337.83    | 51,671.17    | 1.08622E-06 | 35996.03333 |
| Total Signal (TDP-WT-KGD10)            | 9,84,229.45  | 8,40,313.61  | 9,06,912.17  | 9,50,912.50  | 1.03093E-05 | 920591.9313 |
| Total Signal (TDP-Q331K-KGD10)         | 10,98,639.38 | 11,06,139.38 | 11,13,639.38 | 12,80,306.04 | 8.54437E-05 | 1149681.042 |

**Table S18:** Table representing results obtained from fluorescence quantification (Total Cell fluorescence) of for TDP-43 transformed yeast cells treated with TCA cycle metabolites and knock-outs.

| SAMPLES                                | Ratio_1     | Ratio_2     | Ratio_3     | Ratio_4     | Mean        |
|----------------------------------------|-------------|-------------|-------------|-------------|-------------|
| Total Signal (TDP-WT-Control)          | 1.125256342 | 1.167536193 | 1.27183928  | 1.151524993 | 1.179039202 |
| Total Signal (TDP-Q331K-Control)       | 1.258497677 | 1.243388702 | 1.205485804 | 1.28523048  | 1.248150666 |
| Total Signal (TDP-WT-Ketoglutarate)    | 1.08266107  | 1.045840824 | 1.106749415 | 1.011551724 | 1.061700758 |
| Total Signal (TDP-Q331K-Ketoglutarate) | 1.10947612  | 1.131197381 | 1.073414508 | 1.036871081 | 1.087739773 |
| Total Signal (TDP-WT-Succinate)        | 1.148093325 | 1.066051593 | 1.080601756 | 1.144155606 | 1.10972557  |
| Total Signal (TDP-Q331K-Succinate)     | 1.151482561 | 1.041375272 | 1.089708674 | 1.033636933 | 1.07905086  |
| Total Signal (TDP-WT-Malate)           | 1.127883725 | 1.198904631 | 1.176186849 | 1.172044385 | 1.168754897 |
| Total Signal (TDP-Q331K-Malate)        | 1.061034846 | 1.115907289 | 1.122368558 | 1.059755237 | 1.089766483 |
| Total Signal (TDP-WT-MDH2)             | 1           | 1           | 1           | 1           | 1           |
| Total Signal (TDP-Q331K-MDH2)          | 1           | 1           | 1           | 1           | 1           |
| Total Signal (TDP-WT-KGD10)            | 1.197314074 | 1.021919525 | 1.18322226  | 1.179257961 | 1.145428455 |
| Total Signal (TDP-Q331K-KGD10)         | 1.144319017 | 1.14151664  | 1.083050287 | 1.104872351 | 1.118439574 |

**Table S19:** Table representing results obtained from fluorescence quantification (Total Cell fluorescence) of for TDP-43 transformed yeast cells treated with TCA cycle metabolites and knock-outs.



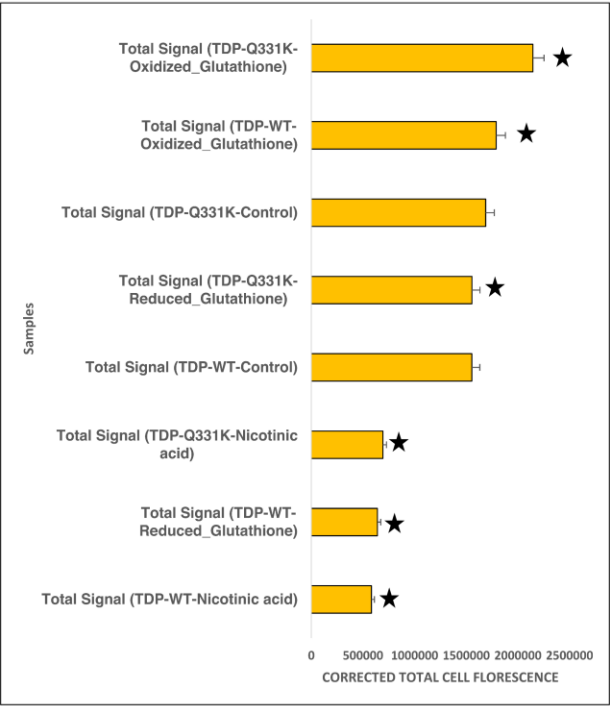

| SAMPLES                                       | CTCF_1       | CTCF_2       | CTCF_3       | CTCF_4       | T.test      | Mean        |
|-----------------------------------------------|--------------|--------------|--------------|--------------|-------------|-------------|
| Total Signal (TDP-WT-Control)                 | 16,50,152.58 | 15,77,285.58 | 15,67,866.42 | 14,17,776.92 |             | 1553270.375 |
| Total Signal (TDP-Q331K-Control)              | 17,91,279.08 | 16,85,129.25 | 16,80,905.75 | 15,91,712.25 |             | 1687256.583 |
| Total Signal (TDP-WT-Oxidized Glutathione)    | 18,38,306.42 | 17,51,542.58 | 18,41,593.08 | 17,24,965.58 | 0.006186002 | 1789101.917 |
| Total Signal (TDP-Q331K-Oxidized Glutathione) | 20,97,257.92 | 21,05,804.25 | 22,10,698.83 | 21,66,553.92 | 8.33639E-05 | 2145078.729 |
| Total Signal (TDP-WT-Reduced Glutathione)     | 6,39,752.25  | 7,73,549.08  | 5,02,861.67  | 6,43,574.33  | 1.68574E-05 | 639934.3333 |
| Total Signal (TDP-Q331K-Reduced Glutathione)  | 14,05,881.75 | 17,95,222.92 | 12,19,880.83 | 17,95,222.92 | 0.408665775 | 1554052.104 |
| Total Signal (TDP-WT-Nicotinic acid)          | 5,85,784.50  | 6,28,070.17  | 6,28,572.00  | 4,84,486.67  | 3.32822E-06 | 581728.3333 |
| Total Signal (TDP-Q331K-Nicotinic acid)       | 8,47,220.17  | 6,44,370.17  | 7,06,276.33  | 5,74,361.50  | 8.23355E-06 | 693057.0417 |

**Table S20:** Table representing results of ratios obtained between Total cell fluorescence and aggregate fluorescence for TDP-43 transformed yeast cells treated glutathione, nicotinic acid and knock-outs. [ P-VALUE<0.05 ★ ]

| SAMPLES                                       | Ratio_1     | Ratio_2     | Ratio_3     | Ratio_4     | Mean        |
|-----------------------------------------------|-------------|-------------|-------------|-------------|-------------|
| Total Signal (TDP-WT-Control)                 | 1.191878341 | 1.157431112 | 1.149505443 | 1.056194791 | 1.138752422 |
| Total Signal (TDP-Q331K-Control)              | 1.060769431 | 1.212780975 | 1.147278831 | 1.177272935 | 1.149525543 |
| Total Signal (TDP-WT-Oxidized_Glutathione)    | 1.072818761 | 1.034412499 | 1.126465024 | 1.007984477 | 1.06042019  |
| Total Signal (TDP-Q331K-Oxidized_Glutathione) | 1.085488718 | 1.056263684 | 1.176735904 | 1.127471394 | 1.111489925 |
| Total Signal (TDP-WT-Reduced_Glutathione)     | 1.302026079 | 1.266422957 | 1.108340518 | 1.546499152 | 1.305822177 |
| Total Signal (TDP-Q331K-Reduced_Glutathione)  | 1.115799018 | 1.108774915 | 1.072341794 | 1.108774915 | 1.101422661 |
| Total Signal (TDP-WT-Nicotinic acid)          | 1.916650125 | 2.348635569 | 1.092895788 | 2.704048743 | 2.015557556 |
| Total Signal (TDP-Q331K-Nicotinic acid)       | 2.27828301  | 1.702434086 | 1.355644517 | 2.324496946 | 1.91521464  |

**Table S21:** Bar graph and table representing results obtained from fluorescence quantification (Total Cell fluorescence) for TDP-43 transformed yeast cells treated with glutathione and nicotinic acid.

| Treatments                                | Fold Change | Treatments                                   | Fold Change |
|-------------------------------------------|-------------|----------------------------------------------|-------------|
| Total Protein-TDP-WT<br>Palmitic acid     | 1.253545097 | Total Protein-TDP-Q331K<br>Palmitic acid     | 1.588137868 |
| Total Protein-TDP-WT<br>Butyric acid      | 0.058266114 | Total Protein-TDP-Q331K<br>Butyric acid      | 0.315693773 |
| Soluble Protein-TDP-WT<br>Palmitic acid   | 1.626951431 | Soluble Protein-TDP-Q331K<br>Palmitic acid   | 1.186988761 |
| Soluble Protein-TDP-WT<br>Butyric acid    | 0.118795761 | Soluble Protein-TDP-Q331K<br>Butyric acid    | 0.264276471 |
| Insoluble Protein-TDP-WT<br>Palmitic acid | 1.204168565 | Insoluble Protein-TDP-Q331K<br>Palmitic acid | 1.389558969 |
| Insoluble Protein-TDP-WT<br>Butyric acid  | 0.068800013 | Insoluble Protein-TDP-Q331K<br>Butyric acid  | 0.291366691 |

**Table S22 :** Quantification results of filter retardation assay carried out on treated *Saccharomyces cerevisiae* transformed with TDP-43 and its mutant.

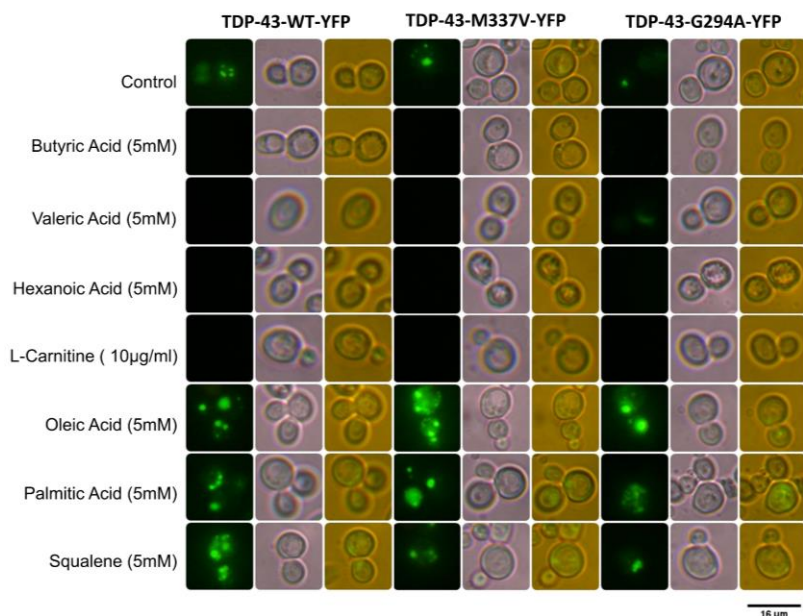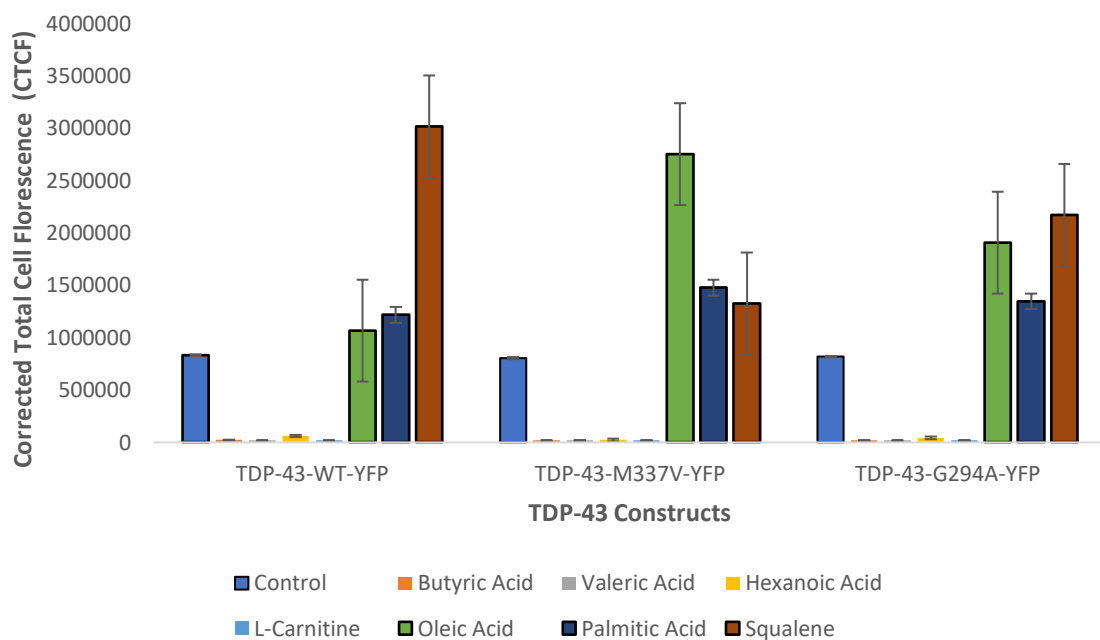

| T.Test (P.Value) | TDP-43-WT-YFP | TDP-43-M337V-YFP | TDP-43-G294A-YFP |
|------------------|---------------|------------------|------------------|
| Control          | 2.44011E-06   | 0.000427338      | 4.2448E-08       |
| Butyric Acid     | 2.40272E-06   | 0.000432605      | 0.218022605      |
| Valeric Acid     | 2.40272E-06   | 0.000432605      | 0.218022605      |
| Hexanoic Acid    | 3.52257E-06   | 0.00044243       | 4.93032E-08      |
| L-Carnitine      | 2.3402E-06    | 0.000426621      | 1.36252E-08      |
| Oleic Acid       | 0.120670489   | 1.84404E-05      | 9.45731E-10      |
| Palmitic Acid    | 0.007426258   | 0.018898981      | 0.002811746      |
| Squalene         | 1.79727E-06   | 0.03036374       | 0.00098102       |

**Table S23 :** Imaging (dark field, bright field and overlay) and quantification results of metabolite addition experiments show that short chain fattyacids reduces amyloidogenesis while long chain fattyacids increase amyloidogenesis in *Saccharomyces cerevisiae* transformed with TDP-43 and its mutant.

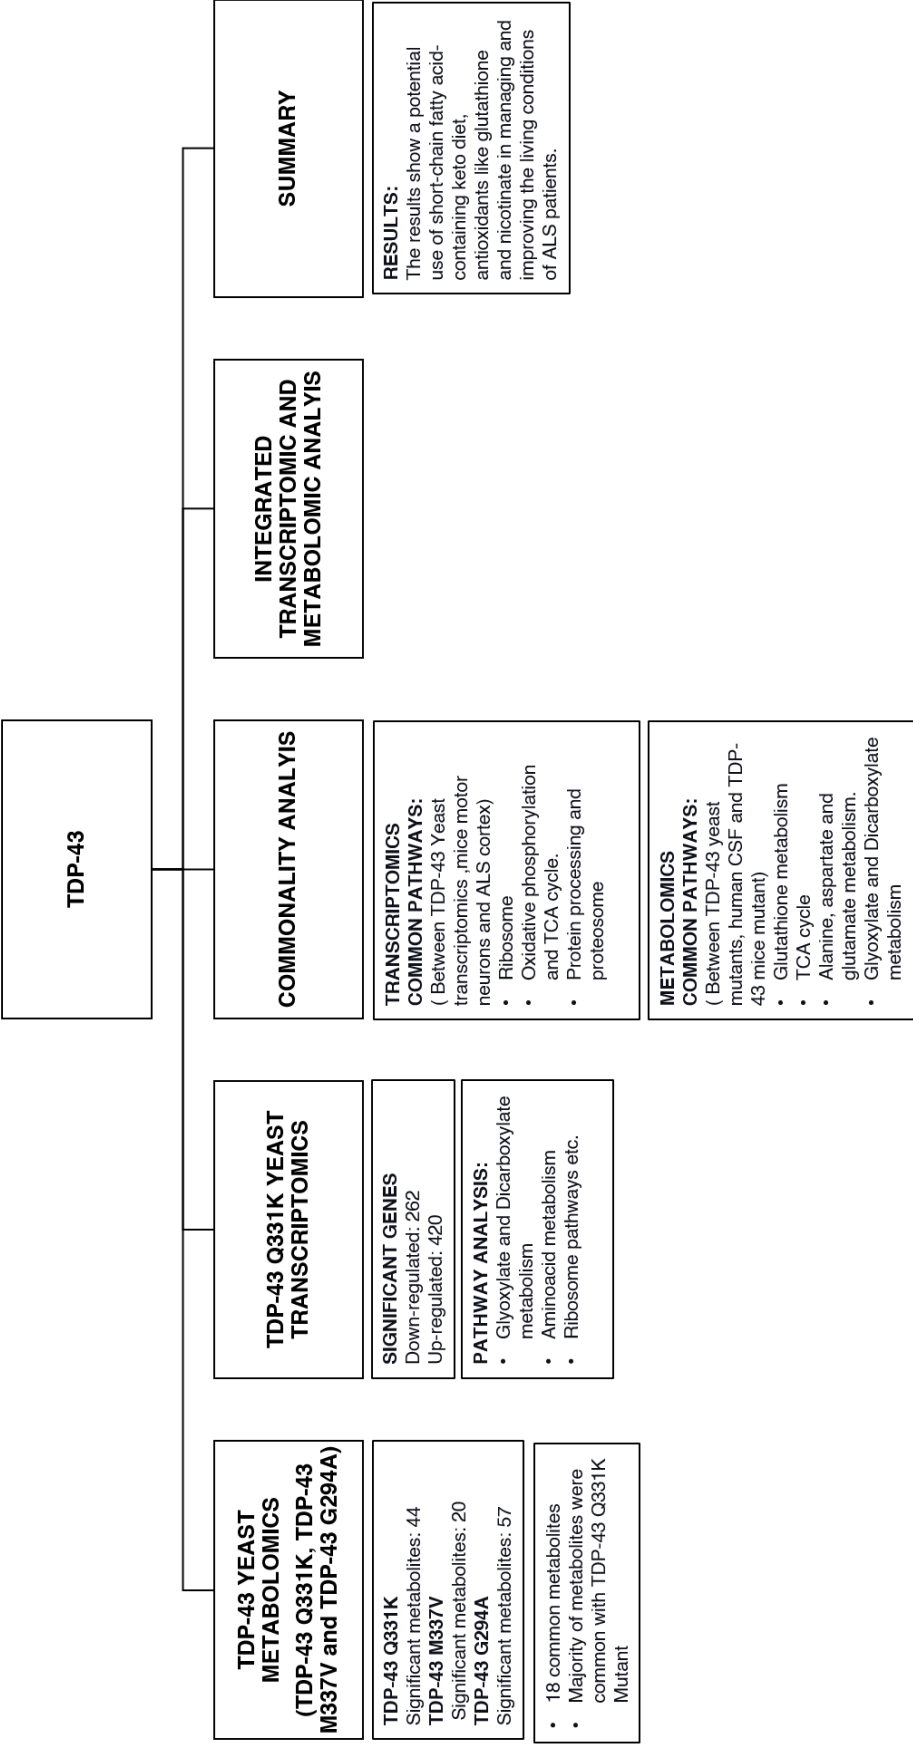

**Table S24:** Figure summarizing the findings of the study.
